# Supplementary material
Source: publisher figshare collection journal article supplement (https://gsajournals.figshare.com/ndownloader/files/23984858)
Supplement: Supplementary file 1 [file 23984858]

## Sheet: File S2
RepositoryID	Family	Individual	ID	Group	CL	LTW	BR	CD	LCN	PL
ML01_210	GEN3_C001	1	GEN3_C001_I001	G01	196.272	5.83703	NA	15.4133	0.319517	36.5933
ML01_211	GEN3_C001	2	GEN3_C001_I002	G01	228.998	5.97156	8.38944	17.6803	0.180621	43.8097
ML01_213	GEN3_C001	3	GEN3_C001_I003	G01	247.179	6.15074	14.3574	18.7307	0.180621	28.0647
ML01_214	GEN3_C001	4	GEN3_C001_I004	G01	280.632	6.73894	10.9793	22.6069	0.180621	26.7526
ML11_063	GEN3_C002	1	GEN3_C002_I001	G01	242.815	5.72561	NA	15.6609	0.180621	33.9691
ML11_066	GEN3_C002	2	GEN3_C002_I002	G01	289.359	6.08529	NA	16.1065	0.180621	38.5614
ML06_220	GEN3_C003	1	GEN3_C003_I001	G01	236.997	5.95546	8.05164	18.7307	0.319517	27.4087
ML06_221	GEN3_C003	2	GEN3_C003_I002	G01	183.181	5.68211	NA	13.9809	0.319517	26.0966
ML06_222	GEN3_C003	3	GEN3_C003_I003	G01	210.817	5.94751	10.4726	16.3894	0.180621	30.6889
ML11_176	GEN3_C004	1	GEN3_C004_I001	G01	340.266	7.06077	10.2474	22.3381	0.180621	26.7526
ML11_177	GEN3_C004	2	GEN3_C004_I002	G01	353.357	7.00462	9.17766	23.8058	0.180621	28.7208
ML11_178	GEN3_C004	3	GEN3_C004_I003	G01	344.63	7.01284	11.8801	22.2285	0.180621	26.7526
ML11_179	GEN3_C004	4	GEN3_C004_I004	G01	315.54	6.67316	11.5423	22.133	0.180621	26.0966
ML11_180	GEN3_C004	5	GEN3_C004_I005	G01	293.723	6.78565	11.4297	20.4672	0.180621	25.4406
ML04_231	GEN3_C005	1	GEN3_C005_I001	G01	251.542	6.46555	9.68437	19.5158	0.319517	25.4406
ML04_232	GEN3_C005	2	GEN3_C005_I002	G01	323.54	6.51287	NA	21.125	0.180621	28.7208
ML04_233	GEN3_C005	3	GEN3_C005_I003	G01	289.359	6.17172	8.55835	18.9889	0.180621	28.0647
ML04_234	GEN3_C005	4	GEN3_C005_I004	G01	305.358	6.42029	8.67095	19.24	0.319517	29.3768
ML04_235	GEN3_C005	5	GEN3_C005_I005	G01	300.268	6.79159	10.4163	21.0083	0.400767	28.7208
ML11_186	GEN3_C006	1	GEN3_C006_I001	G01	199.743	5.27657	NA	14.3912	0.172249	33.9888
ML11_187	GEN3_C006	2	GEN3_C006_I002	G01	238.287	6.00784	9.23735	16.5981	0.172249	33.3327
ML11_188	GEN3_C006	3	GEN3_C006_I003	G01	209.197	5.66435	6.36599	15.0808	0.172249	30.7085
ML11_190	GEN3_C006	4	GEN3_C006_I004	G01	213.56	5.74324	8.28023	15.8872	0.172249	30.0525
ML09_053	GEN3_C007	1	GEN3_C007_I001	G01	273.922	6.32566	NA	17.3903	0.172249	35.9569
ML09_054	GEN3_C007	2	GEN3_C007_I002	G01	268.831	6.4866	12.2213	19.4592	0.172249	41.2052
ML09_055	GEN3_C007	3	GEN3_C007_I003	G01	327.738	6.5708	9.46255	21.2594	0.172249	30.7085
ML09_056	GEN3_C007	4	GEN3_C007_I004	G01	258.65	6.10068	NA	17.2064	0.172249	34.6448
ML09_057	GEN3_C007	5	GEN3_C007_I005	G01	231.742	5.91419	NA	15.7104	0.311145	42.5173
ML09_073	GEN3_C008	1	GEN3_C008_I001	G01	260.104	6.09823	NA	16.8386	0.172249	NA
ML09_074	GEN3_C008	2	GEN3_C008_I002	G01	320.465	6.84802	NA	18.1896	0.311145	39.2371
ML09_075	GEN3_C008	3	GEN3_C008_I003	G01	300.83	6.52572	NA	15.1268	0.311145	31.3646
ML09_076	GEN3_C008	4	GEN3_C008_I004	G01	309.557	6.57986	NA	17.3691	0.311145	27.4283
ML09_077	GEN3_C008	5	GEN3_C008_I005	G01	286.285	7.07081	NA	21.8607	0.392394	35.9569
ML11_156	GEN3_C009	1	GEN3_C009_I001	G01	239.014	5.86503	NA	18.1365	0.172249	28.7404
ML11_157	GEN3_C009	2	GEN3_C009_I002	G01	297.194	6.01838	NA	17.4716	0.172249	28.7404
ML11_158	GEN3_C009	3	GEN3_C009_I003	G01	285.558	6.29848	NA	19.6007	0.172249	43.1733
ML11_160	GEN3_C009	4	GEN3_C009_I004	G01	204.834	5.84136	NA	19.3956	0.311145	33.9888
ML05_207	GEN3_C010	1	GEN3_C010_I001	G02	258.815	6.23105	10.4163	18.6883	0.180621	32.001
ML05_209	GEN3_C010	2	GEN3_C010_I002	G02	279.178	6.50918	10.923	19.5017	0.180621	27.4087
ML05_210	GEN3_C010	3	GEN3_C010_I003	G02	262.451	5.99139	9.57177	16.9128	0.180621	28.0647
ML05_211	GEN3_C010	4	GEN3_C010_I004	G02	270.451	6.73187	12.2742	21.0154	0.180621	26.0966
ML10_112	GEN3_C011	1	GEN3_C011_I001	G02	250.815	5.98094	9.06506	16.9836	0.180621	22.1603
ML10_114	GEN3_C011	2	GEN3_C011_I002	G02	236.27	5.94983	10.6978	16.1418	0.180621	20.8483
ML10_115	GEN3_C011	3	GEN3_C011_I003	G02	182.454	5.35744	12.8372	13.3231	0.180621	19.5362
ML10_116	GEN3_C011	4	GEN3_C011_I004	G02	260.997	6.05975	NA	17.3266	0.180621	24.1285
ML10_016	GEN3_C012	1	GEN3_C012_I001	G02	252.997	6.00073	8.95245	17.8324	0.180621	28.0647
ML10_017	GEN3_C012	2	GEN3_C012_I002	G02	240.634	6.13663	12.3868	18.1754	0.180621	30.6889
ML10_018	GEN3_C012	3	GEN3_C012_I003	G02	268.996	6.25367	12.2742	17.8713	0.180621	28.7208
ML10_019	GEN3_C012	4	GEN3_C012_I004	G02	225.362	6.13701	8.33314	17.2028	0.180621	26.7526
ML10_020	GEN3_C012	5	GEN3_C012_I005	G02	256.633	6.17409	5.06768	19.1905	0.180621	28.7208
ML11_128	GEN3_C013	1	GEN3_C013_I001	G02	271.178	6.67586	12.2742	20.3505	0.180621	29.3768
ML11_129	GEN3_C013	2	GEN3_C013_I002	G02	300.268	6.66602	10.6978	20.0357	0.180621	33.9691
ML11_130	GEN3_C013	3	GEN3_C013_I003	G02	300.995	6.55484	10.6978	17.8465	0.180621	31.3449
ML11_131	GEN3_C013	4	GEN3_C013_I004	G02	279.905	6.55586	9.74067	17.5742	0.180621	27.4087
ML10_170	GEN3_C014	1	GEN3_C014_I001	G02	296.632	6.35751	8.55835	17.4858	0.180621	31.3449
ML10_171	GEN3_C014	2	GEN3_C014_I002	G02	268.996	6.68431	14.2448	18.6706	0.180621	27.4087
ML10_173	GEN3_C014	3	GEN3_C014_I003	G02	294.45	6.22114	8.05164	17.2771	0.180621	24.7845
ML10_174	GEN3_C014	4	GEN3_C014_I004	G02	259.542	6.81505	11.7675	21.9349	0.180621	26.7526
ML09_068	GEN3_C015	1	GEN3_C015_I001	G02	270.451	6.54153	11.3734	19.3885	0.180621	22.1603
ML09_070	GEN3_C015	2	GEN3_C015_I002	G02	299.54	6.76923	11.3734	21.3514	0.180621	26.0966
ML09_072	GEN3_C015	3	GEN3_C015_I003	G02	300.995	6.66525	14.4137	20.3752	0.180621	28.7208
ML09_188	GEN3_C016	1	GEN3_C016_I001	G02	233.361	5.41019	9.12136	17.4999	0.180621	24.1285
ML09_189	GEN3_C016	2	GEN3_C016_I002	G02	279.178	6.27755	7.77013	17.9951	0.180621	32.657
ML09_191	GEN3_C016	3	GEN3_C016_I003	G02	258.088	6.39396	NA	17.942	0.319517	28.7208
ML09_192	GEN3_C016	4	GEN3_C016_I004	G02	310.449	6.60955	10.1911	20.5662	0.180621	25.4406
ML10_190	GEN3_C017	1	GEN3_C017_I001	G02	274.087	6.10945	7.37602	17.9845	0.180621	32.657
ML10_191	GEN3_C017	2	GEN3_C017_I002	G02	276.996	6.05233	8.89615	19.3638	0.180621	25.4406
ML10_192	GEN3_C017	3	GEN3_C017_I003	G02	291.541	6.60422	10.1348	21.9208	0.180621	28.0647
ML11_001	GEN3_C017	4	GEN3_C017_I004	G02	288.632	6.55118	9.40286	21.6378	0.180621	28.0647
ML11_002	GEN3_C017	5	GEN3_C017_I005	G02	278.45	6.56948	9.40286	20.1524	0.319517	25.4406
ML09_164	GEN3_C018	1	GEN3_C018_I001	G02	254.451	6.44163	12.1616	19.2789	0.180621	26.0966
ML09_166	GEN3_C018	2	GEN3_C018_I002	G02	298.086	6.47731	NA	18.6317	0.180621	32.657
ML09_167	GEN3_C018	3	GEN3_C018_I003	G02	299.54	6.10522	NA	18.3629	0.180621	26.7526
ML09_168	GEN3_C018	4	GEN3_C018_I004	G02	295.177	6.58862	10.3037	19.5689	0.180621	26.0966
ML04_216	GEN3_C019	1	GEN3_C019_I001	G02	287.177	6.48164	8.27684	21.3514	0.180621	27.4087
ML04_219	GEN3_C019	2	GEN3_C019_I002	G02	303.904	6.75545	10.4163	21.9279	0.180621	28.0647
ML04_220	GEN3_C019	3	GEN3_C019_I003	G02	298.086	6.6337	10.923	22.6352	0.180621	26.0966
ML11_117	GEN3_C020	1	GEN3_C020_I001	G02	232.634	5.87386	9.96587	17.0295	0.180621	26.7526
ML11_118	GEN3_C020	2	GEN3_C020_I002	G02	206.453	5.65761	NA	15.9155	0.180621	20.1922
ML11_119	GEN3_C020	3	GEN3_C020_I003	G02	228.271	6.03992	10.1348	18.9464	0.180621	26.0966
ML11_121	GEN3_C020	4	GEN3_C020_I004	G02	228.271	6.00096	8.55835	17.5671	0.180621	23.4724
ML10_240	GEN3_C021	1	GEN3_C021_I001	G02	266.087	6.64298	11.3171	21.8713	0.180621	NA
ML10_229	GEN3_C021	2	GEN3_C021_I002	G02	276.996	6.61141	9.79697	22.2285	0.180621	NA
ML10_231	GEN3_C021	3	GEN3_C021_I003	G02	231.907	5.85303	NA	18.2886	0.180621	22.8164
ML10_232	GEN3_C021	4	GEN3_C021_I004	G02	255.179	6.26278	11.6549	18.2002	0.180621	16.256
ML01_227	GEN3_C022	1	GEN3_C022_I001	G02	284.996	6.87082	10.923	22.9287	0.180621	NA
ML01_228	GEN3_C022	2	GEN3_C022_I002	G02	282.814	7.0323	NA	27.2187	0.180621	24.7845
ML01_229	GEN3_C022	3	GEN3_C022_I003	G02	279.905	6.79412	NA	24.5273	0.180621	NA
ML11_123	GEN3_C023	1	GEN3_C023_I001	G02	183.909	6.29893	9.90957	21.0225	0.180621	26.0966
ML11_124	GEN3_C023	2	GEN3_C023_I002	G02	223.907	6.11146	NA	20.5061	0.180621	29.3768
ML11_125	GEN3_C023	3	GEN3_C023_I003	G02	224.634	5.93212	6.98192	17.4469	0.180621	26.7526
ML11_126	GEN3_C023	4	GEN3_C023_I004	G02	227.543	6.06515	6.4189	19.385	0.180621	NA
ML10_092	GEN3_C024	1	GEN3_C024_I001	G02	280.467	6.48034	10.2508	21.27	0.172249	30.7085
ML10_094	GEN3_C024	2	GEN3_C024_I002	G02	305.193	6.52699	NA	22.6069	0.172249	25.4602
ML10_095	GEN3_C024	3	GEN3_C024_I003	G02	276.831	6.0816	9.18105	19.5618	0.172249	27.4283
ML10_096	GEN3_C024	4	GEN3_C024_I004	G02	285.558	6.19196	10.0256	21.0154	0.172249	28.0844
ML09_144	GEN3_C025	1	GEN3_C025_I001	G02	291.376	6.35059	NA	20.8244	0.172249	NA
ML09_146	GEN3_C025	2	GEN3_C025_I002	G02	264.468	6.35277	9.51885	18.4301	0.172249	24.1481
ML09_147	GEN3_C025	3	GEN3_C025_I003	G02	272.467	5.9147	NA	18.9606	0.172249	28.0844
ML09_100	GEN3_C026	1	GEN3_C026_I001	G02	280.467	6.67002	13.7977	20.3859	0.172249	26.1162
ML09_102	GEN3_C026	2	GEN3_C026_I002	G02	275.376	6.93734	9.91296	22.3805	0.311145	34.6448
ML01_240	GEN3_C027	1	GEN3_C027_I001	G02	284.103	6.52042	8.61803	19.7988	0.172249	28.7404
ML02_195	GEN3_C027	2	GEN3_C027_I002	G02	263.013	6.65407	15.9935	21.7015	0.172249	25.4602
ML02_196	GEN3_C027	3	GEN3_C027_I003	G02	205.561	6.05632	16.3313	17.5671	0.172249	23.4921
ML10_225	GEN3_C028	1	GEN3_C028_I001	G02	308.83	6.64117	NA	23.7351	0.172249	28.7404
ML10_226	GEN3_C028	2	GEN3_C028_I002	G02	244.832	6.29444	9.96926	19.5689	0.172249	27.4283
ML10_227	GEN3_C028	3	GEN3_C028_I003	G02	304.466	6.45759	11.3768	21.0932	0.172249	29.3965
ML10_228	GEN3_C028	4	GEN3_C028_I004	G02	268.104	6.30538	10.1382	20.2338	0.172249	30.0525
ML11_192	GEN3_C029	1	GEN3_C029_I001	G02	272.467	6.60676	9.85666	20.8633	0.172249	NA
ML01_193	GEN3_C029	2	GEN3_C029_I002	G02	265.922	6.60269	10.5323	21.8076	0.172249	26.1162
ML01_194	GEN3_C029	3	GEN3_C029_I003	G02	248.468	6.08411	NA	18.5892	0.172249	23.4921
ML01_195	GEN3_C029	4	GEN3_C029_I004	G02	275.376	6.70674	NA	21.2806	0.172249	20.2119
ML04_236	GEN3_C030	1	GEN3_C030_I001	G02	319.738	6.46419	NA	19.6361	0.172249	24.8042
ML09_209	GEN3_C031	1	GEN3_C031_I001	G02	299.375	6.30249	NA	19.4592	0.172249	26.1162
ML09_210	GEN3_C031	2	GEN3_C031_I002	G02	302.284	6.22712	12.6154	18.8474	0.172249	28.0844
ML09_211	GEN3_C031	3	GEN3_C031_I003	G02	286.285	6.43774	NA	19.1233	0.172249	30.0525
ML09_038	GEN3_C032	1	GEN3_C032_I001	G02	292.83	6.84658	9.06844	21.0437	0.311145	30.0525
ML09_040	GEN3_C032	2	GEN3_C032_I002	G02	291.376	6.76907	12.5591	21.4575	0.172249	32.6767
ML09_041	GEN3_C032	3	GEN3_C032_I003	G02	279.013	7.48826	12.3339	22.1966	0.311145	25.4602
ML09_042	GEN3_C032	4	GEN3_C032_I004	G02	281.194	6.60217	NA	21.2453	0.172249	28.0844
ML11_199	GEN3_C033	1	GEN3_C033_I001	G02	313.193	6.99299	8.44913	17.4221	0.392394	29.3965
ML11_200	GEN3_C033	2	GEN3_C033_I002	G02	278.285	6.63524	12.2213	19.9756	0.311145	28.0844
ML11_201	GEN3_C033	3	GEN3_C033_I003	G02	216.469	5.52816	NA	18.034	0.172249	30.0525
ML11_202	GEN3_C033	4	GEN3_C033_I004	G02	319.738	6.69884	9.46255	20.018	0.172249	28.0844
ML11_203	GEN3_C033	5	GEN3_C033_I005	G02	300.103	6.85637	NA	19.5512	0.311145	30.0525
ML11_102	GEN3_C034	1	GEN3_C034_I001	G02	246.287	6.57625	16.275	20.5733	0.172249	21.524
ML11_104	GEN3_C034	2	GEN3_C034_I002	G02	239.014	6.54453	10.5886	22.0198	0.172249	30.7085
ML11_106	GEN3_C034	3	GEN3_C034_I003	G02	295.739	6.86855	8.33653	23.7669	0.172249	21.524
ML08_096	GEN3_C035	1	GEN3_C035_I001	G02	298.648	6.50504	7.77352	21.4433	0.172249	26.1162
ML08_097	GEN3_C035	2	GEN3_C035_I002	G02	225.924	6.34157	NA	20.7961	0.172249	18.8998
ML08_098	GEN3_C035	3	GEN3_C035_I003	G02	285.558	6.77102	10.476	23.3991	0.172249	NA
ML08_099	GEN3_C035	4	GEN3_C035_I004	G02	292.103	6.57034	10.1945	22.0304	0.172249	24.1481
ML08_100	GEN3_C035	5	GEN3_C035_I005	G02	300.83	6.63193	10.5886	23.4911	0.172249	24.1481
ML09_130	GEN3_C036	1	GEN3_C036_I001	G02	285.558	6.52991	NA	20.4177	0.311145	27.4283
ML09_132	GEN3_C036	2	GEN3_C036_I002	G02	275.376	6.49783	14.6986	21.1498	0.172249	35.9569
ML09_134	GEN3_C036	3	GEN3_C036_I003	G02	305.193	7.17469	12.6154	25.2311	0.311145	18.2437
ML02_222	GEN3_C037	1	GEN3_C037_I001	G02	293.557	6.34944	NA	19.1374	0.172249	31.3646
ML02_223	GEN3_C037	2	GEN3_C037_I002	G02	316.102	6.35646	NA	20.2515	0.172249	29.3965
ML02_224	GEN3_C037	3	GEN3_C037_I003	G02	279.013	6.7389	11.2079	22.5185	0.172249	18.8998
ML02_225	GEN3_C037	4	GEN3_C037_I004	G02	267.377	6.79195	11.7709	22.5892	0.172249	22.18
ML02_226	GEN3_C037	5	GEN3_C037_I005	G02	301.557	6.7408	13.7414	20.6582	0.311145	28.0844
ML11_236	GEN3_C038	1	GEN3_C038_I001	G02	290.648	6.13619	NA	19.7139	0.172249	33.9888
ML11_238	GEN3_C038	2	GEN3_C038_I002	G02	243.378	6.14398	NA	19.9933	0.172249	30.0525
ML02_217	GEN3_C039	1	GEN3_C039_I001	G02	282.649	6.87253	15.149	20.7501	0.172249	20.2119
ML02_218	GEN3_C039	2	GEN3_C039_I002	G02	265.195	6.54936	16.6128	19.6325	0.172249	22.18
ML02_221	GEN3_C039	3	GEN3_C039_I003	G02	285.558	6.65149	16.1624	20.3859	0.172249	26.7723
ML09_169	GEN3_C040	1	GEN3_C040_I001	G02	275.376	6.30675	11.8272	20.3399	0.172249	26.1162
ML09_170	GEN3_C040	2	GEN3_C040_I002	G02	299.375	6.67943	14.3044	20.6653	0.172249	27.4283
ML09_171	GEN3_C040	3	GEN3_C040_I003	G02	271.013	6.29346	10.1945	18.7908	0.172249	26.7723
ML09_172	GEN3_C040	4	GEN3_C040_I004	G02	271.013	6.4552	10.8701	19.0667	0.311145	26.7723
ML10_078	GEN3_C041	1	GEN3_C041_I001	G02	225.196	6.14062	NA	20.3717	0.172249	28.0844
ML10_080	GEN3_C041	2	GEN3_C041_I002	G02	253.559	6.56216	NA	21.7439	0.172249	29.3965
ML10_081	GEN3_C041	3	GEN3_C041_I003	G02	295.012	6.51417	8.78694	21.4398	0.172249	28.0844
ML09_108	GEN3_C042	1	GEN3_C042_I001	G02	300.83	6.34597	NA	19.095	0.172249	24.8042
ML09_109	GEN3_C042	2	GEN3_C042_I002	G02	329.192	6.95361	12.9532	24.2621	0.172249	28.0844
ML09_110	GEN3_C042	3	GEN3_C042_I003	G02	304.466	6.13118	9.01214	17.988	0.172249	25.4602
ML09_111	GEN3_C042	4	GEN3_C042_I004	G02	316.102	6.67143	6.7601	21.4221	0.172249	26.7723
ML09_112	GEN3_C042	5	GEN3_C042_I005	G02	320.465	6.46505	NA	20.4707	0.172249	26.1162
ML08_218	GEN3_C043	1	GEN3_C043_I001	G02	240.469	7.25792	NA	17.2241	0.172249	26.1162
ML08_219	GEN3_C043	2	GEN3_C043_I002	G02	237.56	7.21937	NA	16.2762	0.172249	24.8042
ML11_107	GEN3_C044	1	GEN3_C044_I001	G03	274.814	6.39848	10.5852	21.896	0.180621	30.6889
ML11_108	GEN3_C044	2	GEN3_C044_I002	G03	254.451	6.49965	13.738	20.8668	0.180621	28.7208
ML11_109	GEN3_C044	3	GEN3_C044_I003	G03	276.996	6.59931	9.96587	21.9455	0.180621	26.0966
ML11_110	GEN3_C044	4	GEN3_C044_I004	G03	277.723	6.50141	11.0356	20.3611	0.180621	25.4406
ML10_133	GEN3_C045	1	GEN3_C045_I001	G03	232.634	6.52752	10.5852	17.0685	0.400767	32.001
ML10_134	GEN3_C045	2	GEN3_C045_I002	G03	200.635	6.02635	8.27684	19.1586	0.180621	27.4087
ML08_213	GEN3_C046	1	GEN3_C046_I001	G03	349.72	7.20648	8.05164	22.7307	0.180621	30.6889
ML08_214	GEN3_C046	2	GEN3_C046_I002	G03	336.63	7.08821	8.05164	24.3399	0.180621	28.7208
ML08_215	GEN3_C046	3	GEN3_C046_I003	G03	308.995	6.46544	NA	20.3576	0.180621	30.0329
ML08_216	GEN3_C046	4	GEN3_C046_I004	G03	211.544	6.20189	9.74067	17.0932	0.180621	29.3768
ML08_217	GEN3_C046	5	GEN3_C046_I005	G03	227.543	6.35779	11.5986	18.3629	0.319517	27.4087
ML08_165	GEN3_C047	1	GEN3_C047_I001	G03	187.545	5.75261	9.62807	16.4743	0.180621	22.1603
ML08_166	GEN3_C047	2	GEN3_C047_I002	G03	241.361	6.30163	13.7943	17.0331	0.180621	23.4724
ML08_168	GEN3_C047	3	GEN3_C047_I003	G03	188.272	5.85985	NA	15.4699	0.180621	26.0966
ML08_169	GEN3_C047	4	GEN3_C047_I004	G03	192.636	5.93999	7.99533	18.1153	0.180621	25.4406
ML08_155	GEN3_C048	1	GEN3_C048_I001	G03	263.178	6.38203	8.50204	20.1029	0.180621	25.4406
ML08_157	GEN3_C048	2	GEN3_C048_I002	G03	284.268	6.49478	12.4431	20.1383	0.180621	32.001
ML08_158	GEN3_C048	3	GEN3_C048_I003	G03	236.27	6.26485	11.4297	19.1127	0.180621	32.657
ML08_159	GEN3_C048	4	GEN3_C048_I004	G03	239.906	6.49633	9.45916	18.0835	0.180621	28.7208
ML09_183	GEN3_C049	1	GEN3_C049_I001	G03	268.269	6.4096	11.3171	19.6679	0.180621	28.7208
ML09_186	GEN3_C049	2	GEN3_C049_I002	G03	235.543	6.11346	12.8372	17.9668	0.180621	20.1922
ML09_187	GEN3_C049	3	GEN3_C049_I003	G03	261.724	6.32917	10.1911	17.889	0.180621	24.7845
ML02_241	GEN3_C050	1	GEN3_C050_I001	G03	266.814	6.26532	8.10794	19.9508	0.180621	17.5681
ML02_242	GEN3_C050	2	GEN3_C050_I002	G03	215.907	5.81559	6.70041	16.9058	0.180621	26.0966
ML02_243	GEN3_C050	3	GEN3_C050_I003	G03	267.542	6.57304	10.3037	20.3682	0.180621	28.7208
ML02_244	GEN3_C050	4	GEN3_C050_I004	G03	212.998	5.75122	7.09452	14.6989	0.180621	26.7526
ML08_136	GEN3_C051	1	GEN3_C051_I001	G03	305.921	6.59561	NA	20.8067	0.311145	36.6129
ML08_137	GEN3_C051	2	GEN3_C051_I002	G03	284.103	6.0203	NA	20.064	0.172249	31.3646
ML08_138	GEN3_C051	3	GEN3_C051_I003	G03	290.648	6.16237	9.91296	18.9429	0.172249	34.6448
ML08_139	GEN3_C051	4	GEN3_C051_I004	G03	308.83	6.46623	7.71722	20.3363	0.311145	33.9888
ML11_023	GEN3_C052	1	GEN3_C052_I001	G03	241.196	6.03253	10.9264	19.0737	0.172249	28.7404
ML11_024	GEN3_C052	2	GEN3_C052_I002	G03	166.29	5.25138	NA	17.0932	0.172249	NA
ML11_026	GEN3_C052	3	GEN3_C052_I003	G03	215.015	5.69524	10.0256	17.5247	0.172249	25.4602
ML11_027	GEN3_C052	4	GEN3_C052_I004	G03	218.651	6.06472	12.165	19.9897	0.172249	26.7723
ML11_092	GEN3_C053	1	GEN3_C053_I001	G03	295.012	6.71805	13.291	22.186	0.172249	33.3327
ML11_093	GEN3_C053	2	GEN3_C053_I002	G03	264.468	6.36391	13.2347	18.759	0.172249	28.0844
ML11_094	GEN3_C053	3	GEN3_C053_I003	G03	223.015	6.0781	NA	18.3063	0.172249	28.0844
ML10_097	GEN3_C054	1	GEN3_C054_I001	G03	281.921	6.85241	11.8272	23.9438	0.311145	17.5877
ML10_098	GEN3_C054	2	GEN3_C054_I002	G03	244.832	6.09899	NA	18.1896	0.172249	28.0844
ML10_099	GEN3_C054	3	GEN3_C054_I003	G03	286.285	6.73819	12.4465	22.0304	0.172249	22.18
ML09_078	GEN3_C055	1	GEN3_C055_I001	G03	283.376	6.75091	13.9103	22.8863	0.172249	26.7723
ML09_079	GEN3_C055	2	GEN3_C055_I002	G03	243.378	7.28072	10.9264	18.2002	0.172249	27.4283
ML09_080	GEN3_C055	3	GEN3_C055_I003	G03	293.557	6.71783	14.0792	20.5839	0.172249	27.4283
ML09_081	GEN3_C055	4	GEN3_C055_I004	G03	243.378	6.24755	13.4036	19.148	0.172249	22.836
ML09_082	GEN3_C055	5	GEN3_C055_I005	G03	209.197	6.45803	13.6851	21.4433	0.172249	24.8042
ML08_175	GEN3_C056	1	GEN3_C056_I001	G03	191.016	6.02644	9.18105	17.4999	0.172249	23.4921
ML08_176	GEN3_C056	2	GEN3_C056_I002	G03	202.652	6.04984	13.2347	16.927	0.172249	26.7723
ML08_177	GEN3_C056	3	GEN3_C056_I003	G03	207.743	5.92018	8.73064	17.4115	0.172249	26.7723
ML08_178	GEN3_C056	4	GEN3_C056_I004	G03	235.378	6.21619	9.85666	19.6927	0.172249	27.4283
ML08_179	GEN3_C056	5	GEN3_C056_I005	G03	262.286	6.45694	NA	18.2674	0.311145	31.3646
ML09_136	GEN3_C057	1	GEN3_C057_I001	G03	312.466	6.31776	NA	20.2161	0.172249	34.6448
ML01_235	GEN3_C058	1	GEN3_C058_I001	G03	237.56	6.37449	9.80036	18.6847	0.311145	26.1162
ML01_236	GEN3_C058	2	GEN3_C058_I002	G03	249.195	6.20954	8.73064	19.8023	0.172249	23.4921
ML01_237	GEN3_C058	3	GEN3_C058_I003	G03	253.559	7.31114	9.96926	19.9862	0.172249	24.1481
ML01_238	GEN3_C058	4	GEN3_C058_I004	G03	246.287	7.28779	10.1382	20.6829	0.172249	29.3965
ML01_239	GEN3_C058	5	GEN3_C058_I005	G03	239.014	6.22027	9.06844	20.6051	0.172249	24.1481
ML01_196	GEN3_C059	1	GEN3_C059_I001	G03	315.375	6.85919	14.8112	21.6378	0.172249	30.7085
ML01_197	GEN3_C059	2	GEN3_C059_I002	G03	257.922	6.27904	14.0229	19.3001	0.172249	28.0844
ML01_198	GEN3_C059	3	GEN3_C059_I003	G03	245.559	6.23283	11.6583	18.5432	0.172249	28.0844
ML01_199	GEN3_C059	4	GEN3_C059_I004	G03	292.103	6.80508	13.9666	22.6599	0.172249	23.4921
ML11_097	GEN3_C060	1	GEN3_C060_I001	G04	212.271	5.29723	7.77013	17.7121	0.180621	35.9372
ML11_098	GEN3_C060	2	GEN3_C060_I002	G04	298.086	6.66431	12.1616	22.4902	0.180621	48.402
ML11_099	GEN3_C060	3	GEN3_C060_I003	G04	291.541	6.34026	11.8238	18.7661	0.180621	33.9691
ML11_101	GEN3_C060	4	GEN3_C060_I004	G04	305.358	6.3999	8.55835	18.9747	0.180621	37.2493
ML04_226	GEN3_C061	1	GEN3_C061_I001	G04	296.632	6.33743	NA	19.6325	0.180621	38.5614
ML04_227	GEN3_C061	2	GEN3_C061_I002	G04	278.45	6.44223	13.2876	19.4805	0.180621	23.4724
ML04_228	GEN3_C061	3	GEN3_C061_I003	G04	312.631	6.90478	12.2179	23.1126	0.180621	32.657
ML04_229	GEN3_C061	4	GEN3_C061_I004	G04	286.45	7.12964	14.8078	24.0605	0.180621	25.4406
ML04_230	GEN3_C061	5	GEN3_C061_I005	G04	287.177	6.80979	12.8935	21.4115	0.180621	37.9054
ML10_126	GEN3_C062	1	GEN3_C062_I001	G04	284.268	6.36529	14.5263	18.3452	0.180621	26.0966
ML10_127	GEN3_C062	2	GEN3_C062_I002	G04	216.635	5.91064	15.7086	15.9367	0.180621	21.5043
ML10_130	GEN3_C062	3	GEN3_C062_I003	G04	248.633	6.18867	14.5263	17.7829	0.180621	24.1285
ML10_059	GEN3_C063	1	GEN3_C063_I001	G04	323.54	6.95066	9.79697	21.8288	0.180621	35.9372
ML10_060	GEN3_C063	2	GEN3_C063_I002	G04	298.086	6.8814	11.8238	24.0463	0.180621	27.4087
ML10_061	GEN3_C063	3	GEN3_C063_I003	G04	286.45	6.88829	11.1482	21.7404	0.180621	31.3449
ML10_063	GEN3_C063	4	GEN3_C063_I004	G04	283.541	6.44978	NA	22.2851	0.180621	28.0647
ML10_073	GEN3_C064	1	GEN3_C064_I001	G04	299.54	6.85382	9.23396	25.797	0.180621	23.4724
ML10_074	GEN3_C064	2	GEN3_C064_I002	G04	284.996	6.54822	14.0759	18.6953	0.180621	30.6889
ML10_075	GEN3_C064	3	GEN3_C064_I003	G04	309.722	6.96322	13.175	21.4504	0.180621	27.4087
ML10_076	GEN3_C064	4	GEN3_C064_I004	G04	292.268	6.9904	14.5263	23.9473	0.180621	31.3449
ML11_003	GEN3_C065	1	GEN3_C065_I001	G04	285.723	6.37832	9.74067	20.1312	0.180621	22.8164
ML11_004	GEN3_C065	2	GEN3_C065_I002	G04	317.722	6.22468	NA	18.9924	0.180621	26.0966
ML11_006	GEN3_C065	3	GEN3_C065_I003	G04	332.994	6.81409	13.9632	21.0578	0.319517	27.4087
ML11_007	GEN3_C065	4	GEN3_C065_I004	G04	327.903	6.67997	10.0222	20.2373	0.180621	26.0966
ML10_107	GEN3_C066	1	GEN3_C066_I001	G04	295.904	7.06508	13.2876	22.2143	0.319517	20.8483
ML10_108	GEN3_C066	2	GEN3_C066_I002	G04	298.813	6.93015	14.2448	19.4911	0.400767	28.0647
ML10_109	GEN3_C066	3	GEN3_C066_I003	G04	279.178	6.47422	12.5557	18.7307	0.180621	25.4406
ML10_110	GEN3_C066	4	GEN3_C066_I004	G04	320.631	6.90685	11.9364	20.1524	0.319517	25.4406
ML10_111	GEN3_C066	5	GEN3_C066_I005	G04	215.18	5.86543	8.44574	16.2939	0.180621	24.7845
ML10_044	GEN3_C067	1	GEN3_C067_I001	G04	266.814	6.62893	14.0196	19.1268	0.400767	27.4087
ML10_047	GEN3_C067	2	GEN3_C067_I002	G04	295.904	6.83821	11.2045	21.7192	0.180621	27.4087
ML10_048	GEN3_C067	3	GEN3_C067_I003	G04	263.178	6.22536	9.74067	18.1896	0.319517	34.6251
ML06_224	GEN3_C068	1	GEN3_C068_I001	G04	305.358	6.50591	11.7675	20.492	0.180621	32.001
ML06_225	GEN3_C068	2	GEN3_C068_I002	G04	306.086	6.14047	8.72725	19.1692	0.180621	32.001
ML06_226	GEN3_C068	3	GEN3_C068_I003	G04	305.358	6.80284	10.5852	21.2806	0.319517	30.6889
ML06_227	GEN3_C068	4	GEN3_C068_I004	G04	277.723	6.20398	8.38944	19.774	0.180621	35.9372
ML06_228	GEN3_C068	5	GEN3_C068_I005	G04	268.996	6.50885	11.0919	21.2771	0.180621	16.256
ML09_149	GEN3_C069	1	GEN3_C069_I001	G04	297.359	6.73287	10.2474	21.9738	0.180621	31.3449
ML09_150	GEN3_C069	2	GEN3_C069_I002	G04	282.814	7.00594	NA	25.5282	0.180621	NA
ML09_151	GEN3_C069	3	GEN3_C069_I003	G04	286.45	6.72238	10.4726	23.4911	0.180621	28.7208
ML09_153	GEN3_C069	4	GEN3_C069_I004	G04	314.813	6.82616	NA	20.8704	0.180621	27.4087
ML09_178	GEN3_C070	1	GEN3_C070_I001	G04	233.196	5.7937	6.5912	17.2524	0.172249	26.7723
ML09_179	GEN3_C070	2	GEN3_C070_I002	G04	271.013	6.28132	NA	18.7802	0.172249	27.4283
ML09_180	GEN3_C070	3	GEN3_C070_I003	G04	279.013	6.20089	10.7575	17.2135	0.172249	26.1162
ML09_181	GEN3_C070	4	GEN3_C070_I004	G04	316.102	6.51765	NA	19.6538	0.172249	27.4283
ML09_182	GEN3_C070	5	GEN3_C070_I005	G04	260.104	6.0816	7.09791	19.1905	0.172249	25.4602
ML09_023	GEN3_C071	1	GEN3_C071_I001	G04	321.92	6.33583	8.50543	20.8987	0.172249	21.524
ML09_024	GEN3_C071	2	GEN3_C071_I002	G04	283.376	6.07361	7.82982	16.8209	0.172249	20.8679
ML09_025	GEN3_C071	3	GEN3_C071_I003	G04	252.104	6.08853	NA	17.2241	0.392394	29.3965
ML09_026	GEN3_C071	4	GEN3_C071_I004	G04	253.559	5.07732	NA	16.8032	0.172249	29.3965
ML09_027	GEN3_C071	5	GEN3_C071_I005	G04	278.285	6.27156	9.40625	18.7944	0.311145	32.6767
ML08_222	GEN3_C072	1	GEN3_C072_I001	G04	349.555	6.89952	10.8138	22.9358	0.172249	21.524
ML08_223	GEN3_C072	2	GEN3_C072_I002	G04	201.197	5.26034	NA	13.6167	0.172249	13.6514
ML08_224	GEN3_C072	3	GEN3_C072_I003	G04	257.195	7.29924	8.67434	23.3213	0.392394	NA
ML08_225	GEN3_C072	4	GEN3_C072_I004	G04	330.647	6.78371	10.7012	22.4973	0.172249	NA
ML09_175	GEN3_C073	1	GEN3_C073_I001	G04	314.647	6.85772	11.2079	23.3461	0.172249	26.7723
ML09_176	GEN3_C073	2	GEN3_C073_I002	G04	249.923	6.26765	9.29365	21.1462	0.172249	31.3646
ML09_177	GEN3_C073	3	GEN3_C073_I003	G04	239.741	6.26823	13.291	17.9668	0.311145	39.2371
ML09_218	GEN3_C074	1	GEN3_C074_I001	G04	295.012	6.80176	11.7146	23.1091	0.172249	26.1162
ML09_220	GEN3_C074	2	GEN3_C074_I002	G04	287.739	6.71036	10.8701	20.3505	0.392394	26.1162
ML09_221	GEN3_C074	3	GEN3_C074_I003	G04	295.012	6.50937	13.3473	19.7386	0.172249	37.925
ML09_222	GEN3_C074	4	GEN3_C074_I004	G04	286.285	6.5564	12.7843	19.866	0.311145	NA
ML09_140	GEN3_C075	1	GEN3_C075_I001	G04	271.013	7.33382	NA	18.2143	0.392394	24.1481
ML09_143	GEN3_C075	2	GEN3_C075_I002	G04	230.287	6.12848	10.2508	17.8288	0.311145	27.4283
ML08_151	GEN3_C076	1	GEN3_C076_I001	G04	268.104	6.21351	11.5457	19.9084	0.172249	24.1481
ML08_152	GEN3_C076	2	GEN3_C076_I002	G04	253.559	6.84939	10.1382	20.9234	0.311145	18.8998
ML08_153	GEN3_C076	3	GEN3_C076_I003	G04	212.106	6.59323	NA	18.2709	0.172249	26.1162
ML10_185	GEN3_C077	1	GEN3_C077_I001	G04	287.012	6.56594	9.68776	21.3761	0.172249	26.7723
ML10_186	GEN3_C077	2	GEN3_C077_I002	G04	309.557	6.83092	9.29365	22.6423	0.172249	NA
ML10_187	GEN3_C077	3	GEN3_C077_I003	G04	301.557	6.04392	NA	19.0808	0.172249	32.0206
ML10_189	GEN3_C077	4	GEN3_C077_I004	G04	281.194	6.38161	NA	21.6591	0.172249	24.1481
ML10_006	GEN3_C078	1	GEN3_C078_I001	G04	289.194	6.65615	16.0498	20.0251	0.311145	26.7723
ML10_008	GEN3_C078	2	GEN3_C078_I002	G04	247.741	5.60909	NA	16.6228	0.172249	28.7404
ML10_010	GEN3_C078	3	GEN3_C078_I003	G04	329.92	6.32326	NA	22.1542	0.172249	26.7723
ML11_171	GEN3_C079	1	GEN3_C079_I001	G05	284.996	6.19505	12.612	18.568	0.180621	30.0329
ML11_172	GEN3_C079	2	GEN3_C079_I002	G05	211.544	5.47571	10.3037	14.5185	0.180621	25.4406
ML11_173	GEN3_C079	3	GEN3_C079_I003	G05	275.541	6.88549	12.7246	20.6299	0.319517	26.0966
ML11_174	GEN3_C079	4	GEN3_C079_I004	G05	278.45	6.64236	12.5557	19.1374	0.180621	26.0966
ML11_181	GEN3_C080	1	GEN3_C080_I001	G05	266.814	6.86367	12.049	26.0339	0.180621	26.0966
ML11_182	GEN3_C080	2	GEN3_C080_I002	G05	210.817	6.33545	14.8078	20.1843	0.180621	23.4724
ML11_183	GEN3_C080	3	GEN3_C080_I003	G05	242.088	6.66414	9.90957	23.7669	0.180621	26.0966
ML11_184	GEN3_C080	4	GEN3_C080_I004	G05	204.271	6.10157	9.23396	23.1834	0.180621	NA
ML11_185	GEN3_C080	5	GEN3_C080_I005	G05	255.906	6.71307	13.175	22.8262	0.180621	22.1603
ML06_214	GEN3_C081	1	GEN3_C081_I001	G05	290.086	6.81837	10.5289	22.0729	0.180621	24.7845
ML06_215	GEN3_C081	2	GEN3_C081_I002	G05	261.724	6.28878	12.2742	17.9809	0.180621	30.0329
ML06_217	GEN3_C081	3	GEN3_C081_I003	G05	295.904	6.7509	10.0222	21.5353	0.180621	30.6889
ML06_218	GEN3_C081	4	GEN3_C081_I004	G05	252.27	7.11064	13.6817	21.5954	0.319517	25.4406
ML10_235	GEN3_C082	1	GEN3_C082_I001	G05	298.813	7.11266	10.923	25.8041	0.180621	24.7845
ML10_236	GEN3_C082	2	GEN3_C082_I002	G05	300.995	7.03196	13.3439	23.6962	0.180621	26.7526
ML10_237	GEN3_C082	3	GEN3_C082_I003	G05	255.179	6.68745	NA	25.6944	0.180621	NA
ML10_239	GEN3_C082	4	GEN3_C082_I004	G05	284.268	6.90578	12.8935	23.8624	0.180621	29.3768
ML09_103	GEN3_C083	1	GEN3_C083_I001	G05	299.54	6.76146	13.6817	21.6378	0.180621	24.7845
ML09_104	GEN3_C083	2	GEN3_C083_I002	G05	260.997	6.64853	9.79697	22.0729	0.180621	22.8164
ML09_105	GEN3_C083	3	GEN3_C083_I003	G05	293.723	6.60544	12.612	19.0914	0.180621	33.3131
ML09_106	GEN3_C083	4	GEN3_C083_I004	G05	287.177	7.02991	12.2742	23.1197	0.180621	30.6889
ML10_155	GEN3_C084	1	GEN3_C084_I001	G05	311.176	6.62146	13.9069	19.4769	0.180621	30.6889
ML10_156	GEN3_C084	2	GEN3_C084_I002	G05	296.632	6.83532	11.5986	19.7422	0.319517	27.4087
ML10_158	GEN3_C084	3	GEN3_C084_I003	G05	325.721	6.54318	10.8667	19.8836	0.180621	27.4087
ML02_197	GEN3_C085	1	GEN3_C085_I001	G05	309.722	7.05148	14.9204	19.247	0.180621	27.4087
ML02_198	GEN3_C085	2	GEN3_C085_I002	G05	258.088	6.72916	13.4565	20.3116	0.180621	NA
ML02_199	GEN3_C085	3	GEN3_C085_I003	G05	292.995	6.44488	8.55835	18.2957	0.180621	31.3449
ML02_200	GEN3_C085	4	GEN3_C085_I004	G05	327.903	6.72551	9.23396	20.4177	0.180621	26.0966
ML02_201	GEN3_C085	5	GEN3_C085_I005	G05	303.177	6.14658	8.22054	19.0773	0.180621	28.0647
ML01_220	GEN3_C086	1	GEN3_C086_I001	G05	313.358	7.04454	11.7675	19.9473	0.319517	25.4406
ML01_221	GEN3_C086	2	GEN3_C086_I002	G05	285.723	6.52039	6.98192	20.0322	0.180621	NA
ML01_222	GEN3_C086	3	GEN3_C086_I003	G05	288.632	6.50558	8.16424	20.5203	0.180621	NA
ML01_223	GEN3_C086	4	GEN3_C086_I004	G05	291.541	6.834	9.57177	18.1153	0.458414	28.7208
ML01_224	GEN3_C086	5	GEN3_C086_I005	G05	274.087	6.9765	14.47	21.5141	0.319517	26.0966
ML08_061	GEN3_C087	1	GEN3_C087_I001	G05	297.359	6.89386	12.7246	21.0012	0.180621	28.0647
ML08_063	GEN3_C087	2	GEN3_C087_I002	G05	287.177	6.76072	11.0919	22.5892	0.180621	28.0647
ML08_065	GEN3_C087	3	GEN3_C087_I003	G05	273.36	6.39629	11.7112	18.7519	0.180621	36.5933
ML11_162	GEN3_C088	1	GEN3_C088_I001	G05	297.359	6.70394	11.4297	18.6529	0.180621	29.3768
ML11_163	GEN3_C088	2	GEN3_C088_I002	G05	252.997	6.63226	9.51546	19.6361	0.180621	24.7845
ML11_164	GEN3_C088	3	GEN3_C088_I003	G05	311.904	6.83604	11.4297	20.5379	0.180621	22.8164
ML11_165	GEN3_C088	4	GEN3_C088_I004	G05	292.995	6.86857	9.62807	22.0905	0.180621	24.7845
ML06_209	GEN3_C089	1	GEN3_C089_I001	G05	293.723	6.37164	8.33314	18.2957	0.180621	32.001
ML06_210	GEN3_C089	2	GEN3_C089_I002	G05	287.905	6.76271	11.5423	19.9756	0.319517	NA
ML06_211	GEN3_C089	3	GEN3_C089_I003	G05	303.177	6.31832	9.74067	18.3452	0.180621	28.7208
ML06_212	GEN3_C089	4	GEN3_C089_I004	G05	279.905	6.4666	13.3439	18.8439	0.180621	27.4087
ML06_213	GEN3_C089	5	GEN3_C089_I005	G05	264.633	6.46369	14.8078	18.8722	0.180621	22.8164
ML10_033	GEN3_C090	1	GEN3_C090_I001	G05	254.451	6.43398	14.8078	18.9641	0.180621	22.8164
ML02_207	GEN3_C091	1	GEN3_C091_I001	G05	302.449	6.50075	12.049	19.3779	0.180621	26.0966
ML02_208	GEN3_C091	2	GEN3_C091_I002	G05	284.268	6.4139	11.6549	19.4274	0.180621	26.0966
ML02_209	GEN3_C091	3	GEN3_C091_I003	G05	288.632	7.05754	NA	20.5379	0.319517	24.1285
ML02_211	GEN3_C091	4	GEN3_C091_I004	G05	292.268	6.0909	7.48863	18.7484	0.180621	26.0966
ML11_239	GEN3_C092	1	GEN3_C092_I001	G05	295.177	6.75471	14.2448	20.98	0.180621	24.7845
ML11_240	GEN3_C092	2	GEN3_C092_I002	G05	298.086	6.45263	10.5852	19.7351	0.180621	25.4406
ML01_241	GEN3_C092	3	GEN3_C092_I003	G05	321.358	6.62766	10.923	21.8571	0.180621	26.7526
ML01_242	GEN3_C092	4	GEN3_C092_I004	G05	265.36	6.43423	10.8667	21.263	0.180621	28.7208
ML01_243	GEN3_C092	5	GEN3_C092_I005	G05	283.541	6.38137	9.74067	20.9588	0.180621	30.0329
ML10_011	GEN3_C093	1	GEN3_C093_I001	G05	302.449	7.10082	11.6549	23.0101	0.180621	24.7845
ML10_012	GEN3_C093	2	GEN3_C093_I002	G05	302.449	7.07655	11.5986	23.6148	0.180621	27.4087
ML10_013	GEN3_C093	3	GEN3_C093_I003	G05	318.449	6.92872	14.0196	22.1825	0.180621	25.4406
ML10_014	GEN3_C093	4	GEN3_C093_I004	G05	303.177	6.97746	8.83985	20.6193	0.319517	30.6889
ML10_015	GEN3_C093	5	GEN3_C093_I005	G05	288.632	7.01679	12.3305	21.4645	0.180621	22.8164
ML11_138	GEN3_C094	1	GEN3_C094_I001	G05	283.541	6.57971	13.0624	19.9438	0.180621	24.7845
ML11_141	GEN3_C094	2	GEN3_C094_I002	G05	311.904	6.57785	10.8667	19.9049	0.180621	30.0329
ML06_229	GEN3_C095	1	GEN3_C095_I001	G05	314.813	6.72808	10.923	21.2028	0.180621	28.0647
ML06_230	GEN3_C095	2	GEN3_C095_I002	G05	314.813	6.79025	11.9364	23.0843	0.180621	24.7845
ML11_143	GEN3_C096	1	GEN3_C096_I001	G05	244.105	6.64947	10.1945	22.5149	0.172249	22.18
ML11_144	GEN3_C096	2	GEN3_C096_I002	G05	276.831	6.74368	10.1382	22.1153	0.172249	22.18
ML11_145	GEN3_C096	3	GEN3_C096_I003	G05	300.83	6.76081	6.47859	22.1683	0.172249	27.4283
ML11_087	GEN3_C097	1	GEN3_C097_I001	G05	291.376	6.92997	12.3339	21.0967	0.311145	24.8042
ML11_088	GEN3_C097	2	GEN3_C097_I002	G05	295.012	6.97686	12.728	21.7156	0.311145	26.1162
ML11_089	GEN3_C097	3	GEN3_C097_I003	G05	314.647	6.87705	13.9666	22.5326	0.172249	30.0525
ML11_090	GEN3_C097	4	GEN3_C097_I004	G05	288.467	6.59675	10.1945	22.5468	0.172249	28.0844
ML11_091	GEN3_C097	5	GEN3_C097_I005	G05	285.558	6.69644	14.5296	21.3443	0.172249	22.18
ML11_132	GEN3_C098	1	GEN3_C098_I001	G05	275.376	6.43964	14.0792	19.2046	0.172249	30.0525
ML11_133	GEN3_C098	2	GEN3_C098_I002	G05	281.194	6.62508	10.5323	20.591	0.172249	25.4602
ML11_134	GEN3_C098	3	GEN3_C098_I003	G05	283.376	6.48149	14.0229	19.6255	0.172249	25.4602
ML11_135	GEN3_C098	4	GEN3_C098_I004	G05	294.285	6.33241	8.28023	19.5371	0.172249	30.7085
ML04_211	GEN3_C099	1	GEN3_C099_I001	G05	331.374	6.84933	10.9264	22.1259	0.172249	34.6448
ML04_212	GEN3_C099	2	GEN3_C099_I002	G05	329.92	6.95285	9.01214	21.4433	0.172249	25.4602
ML04_213	GEN3_C099	3	GEN3_C099_I003	G05	336.465	6.60199	7.37941	22.423	0.172249	30.0525
ML04_214	GEN3_C099	4	GEN3_C099_I004	G05	253.559	6.15167	13.9666	15.0808	0.172249	28.7404
ML04_215	GEN3_C099	5	GEN3_C099_I005	G05	312.466	6.45247	11.5457	16.2621	0.172249	27.4283
ML09_203	GEN3_C100	1	GEN3_C100_I001	G05	278.285	6.09483	11.602	16.446	0.172249	30.7085
ML09_205	GEN3_C100	2	GEN3_C100_I002	G05	285.558	6.15842	7.77352	18.7625	0.172249	26.7723
ML09_206	GEN3_C100	3	GEN3_C100_I003	G05	268.104	6.52022	9.51885	20.98	0.172249	NA
ML09_207	GEN3_C100	4	GEN3_C100_I004	G05	258.65	6.35583	10.5886	17.1604	0.172249	NA
ML10_064	GEN3_C101	1	GEN3_C101_I001	G05	260.831	5.68854	9.12474	14.8191	0.172249	22.836
ML10_065	GEN3_C101	2	GEN3_C101_I002	G05	277.558	6.51814	8.16763	18.8368	0.172249	26.7723
ML10_066	GEN3_C101	3	GEN3_C101_I003	G05	288.467	6.3417	14.3607	18.1825	0.172249	28.0844
ML09_043	GEN3_C102	1	GEN3_C102_I001	G05	311.011	6.42392	9.80036	18.3912	0.172249	28.7404
ML09_044	GEN3_C102	2	GEN3_C102_I002	G05	284.83	6.40003	12.5028	18.5928	0.172249	26.7723
ML09_047	GEN3_C102	3	GEN3_C102_I003	G05	283.376	6.52425	14.3044	20.1524	0.172249	30.7085
ML05_193	GEN3_C103	1	GEN3_C103_I001	G05	270.286	6.70459	9.01214	21.2453	0.172249	24.8042
ML05_194	GEN3_C103	2	GEN3_C103_I002	G05	249.923	6.54205	10.1945	21.6308	0.172249	24.1481
ML05_195	GEN3_C103	3	GEN3_C103_I003	G05	247.014	6.26779	9.85666	18.8686	0.172249	24.8042
ML05_196	GEN3_C103	4	GEN3_C103_I004	G05	242.65	6.45922	10.9264	19.8165	0.172249	26.7723
ML05_197	GEN3_C103	5	GEN3_C103_I005	G05	238.287	6.5896	12.4465	20.3187	0.172249	24.8042
ML11_112	GEN3_C104	1	GEN3_C104_I001	G06	270.451	6.7622	13.738	19.8518	0.319517	NA
ML11_113	GEN3_C104	2	GEN3_C104_I002	G06	266.814	6.4063	16.159	19.4769	0.180621	28.7208
ML11_114	GEN3_C104	3	GEN3_C104_I003	G06	266.087	6.40579	NA	18.4124	0.319517	NA
ML11_115	GEN3_C104	4	GEN3_C104_I004	G06	272.632	6.86531	15.7086	16.5804	0.319517	32.001
ML11_116	GEN3_C104	5	GEN3_C104_I005	G06	263.906	6.88017	NA	19.6078	0.319517	24.7845
ML05_212	GEN3_C105	1	GEN3_C105_I001	G06	275.541	6.55858	NA	19.2824	0.180621	26.7526
ML05_214	GEN3_C105	2	GEN3_C105_I002	G06	300.995	6.67938	NA	23.9261	0.180621	NA
ML05_215	GEN3_C105	3	GEN3_C105_I003	G06	295.904	7.18148	11.486	21.9031	0.400767	29.3768
ML11_231	GEN3_C106	1	GEN3_C106_I001	G06	300.995	6.93446	NA	22.2285	0.180621	26.0966
ML11_232	GEN3_C106	2	GEN3_C106_I002	G06	281.359	7.06216	10.8667	23.3213	0.180621	NA
ML11_233	GEN3_C106	3	GEN3_C106_I003	G06	331.539	6.7381	NA	20.881	0.180621	NA
ML05_237	GEN3_C107	1	GEN3_C107_I001	G06	308.995	6.8089	13.7943	20.0322	0.180621	33.3131
ML05_238	GEN3_C107	2	GEN3_C107_I002	G06	316.267	6.89722	12.1616	21.606	0.180621	33.3131
ML05_239	GEN3_C107	3	GEN3_C107_I003	G06	322.812	6.71758	11.1482	19.629	0.180621	32.657
ML06_193	GEN3_C107	4	GEN3_C107_I004	G06	340.266	7.08772	12.2742	20.156	0.319517	37.2493
ML09_113	GEN3_C108	1	GEN3_C108_I001	G06	324.994	6.44356	12.612	16.4	0.319517	28.0647
ML09_114	GEN3_C108	2	GEN3_C108_I002	G06	264.633	6.22434	NA	15.8059	0.180621	33.3131
ML09_115	GEN3_C108	3	GEN3_C108_I003	G06	239.906	5.60346	NA	14.6494	0.180621	30.0329
ML09_117	GEN3_C108	4	GEN3_C108_I004	G06	242.815	6.10865	11.2608	15.7422	0.180621	28.7208
ML08_101	GEN3_C109	1	GEN3_C109_I001	G06	322.812	7.29297	11.0919	22.2002	0.319517	26.7526
ML08_102	GEN3_C109	2	GEN3_C109_I002	G06	217.362	5.70684	NA	13.9845	0.180621	18.2241
ML08_103	GEN3_C109	3	GEN3_C109_I003	G06	290.086	6.63433	11.2045	21.988	0.180621	26.7526
ML08_105	GEN3_C109	4	GEN3_C109_I004	G06	203.544	6.05101	8.61465	19.9791	0.180621	NA
ML09_118	GEN3_C110	1	GEN3_C110_I001	G06	319.176	6.51113	11.8801	19.5335	0.180621	26.0966
ML09_119	GEN3_C110	2	GEN3_C110_I002	G06	317.722	6.35751	11.2608	20.2585	0.180621	28.0647
ML09_120	GEN3_C110	3	GEN3_C110_I003	G06	312.631	6.37485	7.93903	19.5547	0.180621	28.7208
ML09_121	GEN3_C110	4	GEN3_C110_I004	G06	346.084	6.9005	NA	20.301	0.400767	26.0966
ML09_122	GEN3_C110	5	GEN3_C110_I005	G06	295.177	6.8045	10.4726	20.927	0.180621	NA
ML10_180	GEN3_C111	1	GEN3_C111_I001	G06	245.724	6.99901	11.3734	16.1666	0.400767	22.1603
ML10_181	GEN3_C111	2	GEN3_C111_I002	G06	276.269	6.65212	11.7112	20.0534	0.319517	41.1856
ML10_182	GEN3_C111	3	GEN3_C111_I003	G06	251.542	6.46683	9.51546	18.2568	0.180621	NA
ML10_184	GEN3_C111	4	GEN3_C111_I004	G06	249.361	6.6582	NA	14.1153	0.400767	NA
ML11_204	GEN3_C112	1	GEN3_C112_I001	G06	324.994	6.88115	10.2474	20.6688	0.180621	29.3768
ML11_205	GEN3_C112	2	GEN3_C112_I002	G06	294.45	6.83115	11.6549	20.3823	0.180621	28.7208
ML11_207	GEN3_C112	3	GEN3_C112_I003	G06	312.631	6.82019	11.2045	21.5883	0.180621	20.8483
ML11_208	GEN3_C112	4	GEN3_C112_I004	G06	309.722	6.87622	13.0061	20.4071	0.180621	22.8164
ML08_191	GEN3_C113	1	GEN3_C113_I001	G06	306.648	6.30552	NA	18.1153	0.311145	31.3646
ML08_192	GEN3_C113	2	GEN3_C113_I002	G06	276.831	6.54519	12.3339	16.4248	0.392394	28.0844
ML09_001	GEN3_C113	3	GEN3_C113_I003	G06	238.287	6.51477	14.8675	21.5176	0.172249	23.4921
ML09_002	GEN3_C113	4	GEN3_C113_I004	G06	248.468	6.3191	9.80036	19.1056	0.311145	NA
ML11_209	GEN3_C114	1	GEN3_C114_I001	G06	313.193	6.88953	13.1221	22.3204	0.172249	30.0525
ML11_210	GEN3_C114	2	GEN3_C114_I002	G06	325.556	6.96011	11.4331	23.2293	0.172249	28.0844
ML11_211	GEN3_C114	3	GEN3_C114_I003	G06	325.556	6.99365	9.91296	23.8907	0.172249	27.4283
ML11_212	GEN3_C114	4	GEN3_C114_I004	G06	299.375	6.70392	11.4894	21.1958	0.172249	26.7723
ML11_213	GEN3_C114	5	GEN3_C114_I005	G06	300.83	6.80781	10.0819	23.2718	0.172249	32.6767
ML05_222	GEN3_C115	1	GEN3_C115_I001	G06	319.011	7.02232	11.602	22.8368	0.172249	24.8042
ML05_223	GEN3_C115	2	GEN3_C115_I002	G06	351.737	6.72443	13.0095	21.1922	0.172249	29.3965
ML05_224	GEN3_C115	3	GEN3_C115_I003	G06	279.74	6.8218	9.96926	23.9791	0.172249	NA
ML05_225	GEN3_C115	4	GEN3_C115_I004	G06	361.918	7.12535	10.8701	24.1878	0.172249	NA
ML05_226	GEN3_C115	5	GEN3_C115_I005	G06	351.01	6.94504	10.5886	19.9933	0.311145	25.4602
ML11_195	GEN3_C116	1	GEN3_C116_I001	G06	295.012	6.67889	11.3205	20.8103	0.172249	28.7404
ML11_196	GEN3_C116	2	GEN3_C116_I002	G06	326.283	6.61466	7.43571	22.0552	0.172249	30.7085
ML11_197	GEN3_C116	3	GEN3_C116_I003	G06	269.558	6.55891	16.275	19.3107	0.172249	24.8042
ML10_175	GEN3_C117	1	GEN3_C117_I001	G06	292.83	6.83635	NA	19.728	0.311145	28.7404
ML10_176	GEN3_C117	2	GEN3_C117_I002	G06	289.194	6.76012	9.34995	18.4619	0.392394	30.7085
ML10_177	GEN3_C117	3	GEN3_C117_I003	G06	252.832	6.44873	11.8272	18.4301	0.311145	25.4602
ML10_178	GEN3_C117	4	GEN3_C117_I004	G06	331.374	7.24778	12.4465	20.209	0.311145	NA
ML10_179	GEN3_C117	5	GEN3_C117_I005	G06	302.284	6.57262	NA	19.2718	0.311145	32.6767
ML08_140	GEN3_C118	1	GEN3_C118_I001	G06	311.739	7.16142	11.039	23.3461	0.392394	30.0525
ML08_141	GEN3_C118	2	GEN3_C118_I002	G06	307.375	6.60849	6.929	22.7873	0.172249	27.4283
ML08_143	GEN3_C118	3	GEN3_C118_I003	G06	327.011	6.8596	NA	22.8545	0.172249	33.3327
ML08_144	GEN3_C118	4	GEN3_C118_I004	G06	322.647	7.30216	NA	23.629	0.311145	28.0844
ML09_083	GEN3_C119	1	GEN3_C119_I001	G06	265.922	6.55845	11.039	18.7307	0.172249	NA
ML09_084	GEN3_C119	2	GEN3_C119_I002	G06	304.466	7.10076	14.8675	24.1241	0.311145	24.1481
ML09_085	GEN3_C119	3	GEN3_C119_I003	G06	329.192	6.92739	12.6717	22.858	0.172249	26.7723
ML09_086	GEN3_C119	4	GEN3_C119_I004	G06	313.193	7.13054	13.2347	22.2638	0.311145	26.7723
ML09_087	GEN3_C119	5	GEN3_C119_I005	G06	311.739	6.94519	12.8969	20.6617	0.172249	26.7723
ML08_114	GEN3_C120	1	GEN3_C120_I001	G07	253.724	6.28557	12.1616	18.1153	0.180621	37.2493
ML08_115	GEN3_C120	2	GEN3_C120_I002	G07	261.724	6.69182	11.0356	19.866	0.180621	24.1285
ML01_230	GEN3_C121	1	GEN3_C121_I001	G07	255.906	6.52794	12.1616	18.904	0.319517	25.4406
ML01_231	GEN3_C121	2	GEN3_C121_I002	G07	269.723	6.40528	9.06506	19.2117	0.180621	NA
ML01_232	GEN3_C121	3	GEN3_C121_I003	G07	218.816	7.09049	9.51546	22.5786	0.319517	NA
ML01_233	GEN3_C121	4	GEN3_C121_I004	G07	246.452	6.07857	10.5852	18.667	0.180621	28.0647
ML01_234	GEN3_C121	5	GEN3_C121_I005	G07	282.087	6.99304	9.90957	25.026	0.180621	29.3768
ML10_021	GEN3_C122	1	GEN3_C122_I001	G07	288.632	6.87019	11.8238	21.1356	0.180621	27.4087
ML10_022	GEN3_C122	2	GEN3_C122_I002	G07	279.905	7.21967	10.1348	25.5105	0.180621	NA
ML10_023	GEN3_C122	3	GEN3_C122_I003	G07	271.905	6.99428	14.2448	24.2727	0.180621	28.7208
ML10_024	GEN3_C122	4	GEN3_C122_I004	G07	311.904	7.01684	12.8935	24.1312	0.180621	28.0647
ML10_025	GEN3_C122	5	GEN3_C122_I005	G07	263.178	6.79692	14.1885	20.8421	0.180621	24.7845
ML11_147	GEN3_C123	1	GEN3_C123_I001	G07	299.54	6.53967	10.6978	20.0711	0.180621	30.6889
ML11_148	GEN3_C123	2	GEN3_C123_I002	G07	196.999	5.6564	13.738	14.7413	0.180621	20.1922
ML11_149	GEN3_C123	3	GEN3_C123_I003	G07	265.36	6.32716	11.7675	19.4239	0.180621	33.3131
ML11_150	GEN3_C123	4	GEN3_C123_I004	G07	293.723	6.57471	9.85327	20.69	0.180621	27.4087
ML11_151	GEN3_C123	5	GEN3_C123_I005	G07	292.268	6.5472	11.7675	20.3646	0.180621	33.3131
ML09_058	GEN3_C124	1	GEN3_C124_I001	G07	271.905	6.24736	NA	18.9394	0.180621	30.6889
ML09_059	GEN3_C124	2	GEN3_C124_I002	G07	241.361	6.11246	6.75671	17.7829	0.180621	29.3768
ML09_060	GEN3_C124	3	GEN3_C124_I003	G07	250.815	5.93895	NA	16.1914	0.180621	30.0329
ML09_062	GEN3_C124	4	GEN3_C124_I004	G07	266.814	6.16104	9.96587	17.6591	0.180621	33.9691
ML10_160	GEN3_C125	1	GEN3_C125_I001	G07	289.359	6.0132	9.74067	16.9341	0.180621	33.3131
ML10_161	GEN3_C125	2	GEN3_C125_I002	G07	276.269	5.95622	10.4726	16.3611	0.180621	28.7208
ML10_162	GEN3_C125	3	GEN3_C125_I003	G07	306.086	6.19628	12.1053	17.27	0.180621	30.0329
ML10_163	GEN3_C125	4	GEN3_C125_I004	G07	249.361	5.9807	9.17766	17.1463	0.180621	32.657
ML10_164	GEN3_C125	5	GEN3_C125_I005	G07	285.723	6.13527	9.79697	17.7652	0.180621	32.001
ML09_228	GEN3_C126	1	GEN3_C126_I001	G07	317.722	6.39848	10.0785	19.0525	0.180621	25.4406
ML09_229	GEN3_C126	2	GEN3_C126_I002	G07	265.36	6.07094	12.6683	18.3487	0.180621	24.1285
ML09_230	GEN3_C126	3	GEN3_C126_I003	G07	263.906	6.079	6.98192	17.9774	0.180621	26.0966
ML09_231	GEN3_C126	4	GEN3_C126_I004	G07	309.722	6.47341	6.81301	18.6458	0.180621	28.7208
ML09_232	GEN3_C126	5	GEN3_C126_I005	G07	348.266	7.19027	12.7246	21.9102	0.180621	26.0966
ML05_203	GEN3_C127	1	GEN3_C127_I001	G07	348.266	7.02825	12.1616	21.4645	0.180621	26.7526
ML05_204	GEN3_C127	2	GEN3_C127_I002	G07	309.722	6.44235	9.00875	20.4531	0.180621	30.0329
ML05_205	GEN3_C127	3	GEN3_C127_I003	G07	301.722	6.9008	12.612	22.0304	0.180621	27.4087
ML10_050	GEN3_C128	1	GEN3_C128_I001	G07	258.088	6.36366	11.3734	15.5724	0.319517	30.6889
ML10_051	GEN3_C128	2	GEN3_C128_I002	G07	247.179	6.02246	NA	16.3222	0.180621	30.6889
ML10_052	GEN3_C128	3	GEN3_C128_I003	G07	210.089	5.59907	17.1724	13.4787	0.180621	20.1922
ML10_053	GEN3_C128	4	GEN3_C128_I004	G07	267.542	6.47318	NA	16.9022	0.319517	40.5295
ML11_048	GEN3_C129	1	GEN3_C129_I001	G07	351.175	7.01953	11.7112	23.2506	0.180621	NA
ML11_049	GEN3_C129	2	GEN3_C129_I002	G07	331.539	6.89596	12.3868	23.0561	0.180621	NA
ML11_050	GEN3_C129	3	GEN3_C129_I003	G07	287.905	6.72262	11.0919	20.1348	0.180621	27.4087
ML11_051	GEN3_C129	4	GEN3_C129_I004	G07	296.632	6.87188	15.4834	21.316	0.180621	25.4406
ML11_052	GEN3_C129	5	GEN3_C129_I005	G07	289.359	6.89806	11.7112	21.8996	0.180621	29.3768
ML02_202	GEN3_C130	1	GEN3_C130_I001	G07	298.086	6.67426	13.2313	20.3894	0.180621	20.1922
ML02_203	GEN3_C130	2	GEN3_C130_I002	G07	285.723	6.25848	10.0222	18.2249	0.180621	28.7208
ML02_204	GEN3_C130	3	GEN3_C130_I003	G07	304.631	6.88189	11.7675	23.0419	0.180621	29.3768
ML02_205	GEN3_C130	4	GEN3_C130_I004	G07	303.904	6.18725	NA	18.6918	0.180621	34.6251
ML02_206	GEN3_C130	5	GEN3_C130_I005	G07	304.631	6.45807	7.93903	17.889	0.319517	33.9691
ML08_071	GEN3_C131	1	GEN3_C131_I001	G07	314.085	6.79783	10.0785	21.7121	0.180621	NA
ML08_072	GEN3_C131	2	GEN3_C131_I002	G07	324.267	6.97772	13.5691	22.0941	0.180621	26.0966
ML08_073	GEN3_C131	3	GEN3_C131_I003	G07	348.266	7.03269	11.9927	22.7448	0.180621	NA
ML08_074	GEN3_C131	4	GEN3_C131_I004	G07	270.451	6.42029	10.5289	19.1091	0.180621	28.0647
ML04_221	GEN3_C132	1	GEN3_C132_I001	G07	279.905	6.45204	9.40286	19.7917	0.319517	26.0966
ML04_222	GEN3_C132	2	GEN3_C132_I002	G07	326.449	6.72285	9.17766	21.2417	0.180621	30.0329
ML04_223	GEN3_C132	3	GEN3_C132_I003	G07	309.722	6.68097	9.96587	20.8279	0.180621	26.7526
ML04_224	GEN3_C132	4	GEN3_C132_I004	G07	313.358	6.38861	9.62807	19.3779	0.180621	30.0329
ML04_225	GEN3_C132	5	GEN3_C132_I005	G07	300.268	6.99077	10.6415	20.6122	0.319517	26.0966
ML10_165	GEN3_C133	1	GEN3_C133_I001	G07	287.177	6.36052	9.96587	20.736	0.180621	32.657
ML10_166	GEN3_C133	2	GEN3_C133_I002	G07	298.086	6.46927	10.3037	18.6034	0.180621	30.0329
ML10_167	GEN3_C133	3	GEN3_C133_I003	G07	298.086	6.54986	11.6549	18.3841	0.180621	29.3768
ML10_168	GEN3_C133	4	GEN3_C133_I004	G07	276.996	6.34279	12.9498	18.3452	0.180621	30.0329
ML10_169	GEN3_C133	5	GEN3_C133_I005	G07	300.995	6.33388	NA	18.2497	0.180621	35.9372
ML10_054	GEN3_C134	1	GEN3_C134_I001	G07	248.633	6.15955	10.1911	18.3098	0.180621	30.6889
ML10_055	GEN3_C134	2	GEN3_C134_I002	G07	263.906	6.27879	11.7112	18.4725	0.180621	32.657
ML10_056	GEN3_C134	3	GEN3_C134_I003	G07	237.725	6.11266	9.29026	16.8386	0.180621	32.657
ML10_057	GEN3_C134	4	GEN3_C134_I004	G07	234.088	6.12828	10.4163	17.0366	0.180621	30.6889
ML10_058	GEN3_C134	5	GEN3_C134_I005	G07	242.815	6.33103	NA	16.9058	0.319517	32.001
ML09_213	GEN3_C135	1	GEN3_C135_I001	G07	302.449	6.32716	12.9498	17.2983	0.180621	24.7845
ML09_214	GEN3_C135	2	GEN3_C135_I002	G07	326.449	7.37458	11.5986	22.8686	0.180621	26.0966
ML11_168	GEN3_C136	1	GEN3_C136_I001	G07	277.723	6.55798	9.00875	21.7864	0.180621	30.6889
ML11_170	GEN3_C136	2	GEN3_C136_I002	G07	298.813	6.68272	8.33314	20.9623	0.180621	37.9054
ML10_002	GEN3_C137	1	GEN3_C137_I001	G07	281.194	6.17306	NA	18.3699	0.172249	34.6448
ML10_003	GEN3_C137	2	GEN3_C137_I002	G07	226.651	5.78398	NA	16.4354	0.172249	32.6767
ML10_005	GEN3_C137	3	GEN3_C137_I003	G07	235.378	6.06631	8.39283	15.339	0.311145	30.0525
ML09_128	GEN3_C138	1	GEN3_C138_I001	G07	292.103	6.58587	11.9398	21.0048	0.172249	25.4602
ML09_129	GEN3_C138	2	GEN3_C138_I002	G07	253.559	6.57806	7.21051	24.1206	0.311145	NA
ML10_039	GEN3_C139	1	GEN3_C139_I001	G07	305.193	6.37214	11.4331	17.6768	0.172249	30.7085
ML10_040	GEN3_C139	2	GEN3_C139_I002	G07	303.739	6.38368	NA	21.6308	0.172249	33.3327
ML10_041	GEN3_C139	3	GEN3_C139_I003	G07	323.374	6.50907	9.23735	20.7218	0.172249	33.9888
ML10_042	GEN3_C139	4	GEN3_C139_I004	G07	313.193	6.67997	11.7709	20.3116	0.172249	37.925
ML10_043	GEN3_C139	5	GEN3_C139_I005	G07	322.647	6.49537	7.82982	20.446	0.172249	37.269
ML10_200	GEN3_C140	1	GEN3_C140_I001	G07	300.103	6.20651	NA	17.652	0.172249	34.6448
ML10_201	GEN3_C140	2	GEN3_C140_I002	G07	292.83	6.51546	NA	18.8156	0.172249	30.7085
ML10_202	GEN3_C140	3	GEN3_C140_I003	G07	312.466	6.61534	NA	20.8633	0.311145	27.4283
ML10_203	GEN3_C140	4	GEN3_C140_I004	G07	312.466	6.38914	12.6717	18.1012	0.311145	30.0525
ML10_204	GEN3_C140	5	GEN3_C140_I005	G07	276.831	5.97878	NA	16.5556	0.311145	36.6129
ML08_076	GEN3_C141	1	GEN3_C141_I001	G07	320.465	7.45135	9.40625	21.652	0.172249	24.1481
ML08_077	GEN3_C141	2	GEN3_C141_I002	G07	276.831	7.32538	9.01214	16.8138	0.311145	28.7404
ML08_078	GEN3_C141	3	GEN3_C141_I003	G07	339.374	6.68136	13.9666	19.8271	0.172249	30.7085
ML08_079	GEN3_C141	4	GEN3_C141_I004	G07	300.83	6.01689	NA	17.5777	0.172249	30.7085
ML08_080	GEN3_C141	5	GEN3_C141_I005	G07	313.193	7.40927	12.5028	19.0525	0.172249	21.524
ML09_198	GEN3_C142	1	GEN3_C142_I001	G07	279.013	6.27904	NA	18.5645	0.172249	30.7085
ML09_199	GEN3_C142	2	GEN3_C142_I002	G07	265.195	5.49704	NA	15.7528	0.172249	26.1162
ML09_200	GEN3_C142	3	GEN3_C142_I003	G07	363.373	7.512	11.9961	21.8147	0.172249	29.3965
ML09_201	GEN3_C142	4	GEN3_C142_I004	G07	337.192	6.79474	12.6154	20.0782	0.172249	24.8042
ML09_202	GEN3_C142	5	GEN3_C142_I005	G07	217.924	5.78977	NA	17.2276	0.172249	33.3327
ML10_070	GEN3_C143	1	GEN3_C143_I001	G07	225.924	7.2051	NA	14.1118	0.311145	31.3646
ML10_205	GEN3_C144	1	GEN3_C144_I001	G07	318.284	6.50967	8.11133	19.6962	0.172249	25.4602
ML10_206	GEN3_C144	2	GEN3_C144_I002	G07	277.558	6.29248	NA	18.7307	0.172249	32.6767
ML10_207	GEN3_C144	3	GEN3_C144_I003	G07	282.649	5.92018	NA	16.2904	0.172249	31.3646
ML10_208	GEN3_C144	4	GEN3_C144_I004	G07	265.195	5.81739	NA	17.6166	0.172249	26.1162
ML10_209	GEN3_C144	5	GEN3_C144_I005	G07	296.466	6.28388	NA	18.8085	0.172249	30.0525
ML10_212	GEN3_C145	1	GEN3_C145_I001	G07	291.376	6.23451	9.01214	19.2188	0.311145	27.4283
ML10_213	GEN3_C145	2	GEN3_C145_I002	G07	274.649	6.20315	12.3902	18.5928	0.172249	28.0844
ML10_214	GEN3_C145	3	GEN3_C145_I003	G07	262.286	6.21224	8.11133	18.4478	0.172249	26.7723
ML11_053	GEN3_C146	1	GEN3_C146_I001	G07	315.375	7.21073	10.7575	21.9774	0.311145	NA
ML11_054	GEN3_C146	2	GEN3_C146_I002	G07	289.921	6.95497	10.9827	23.2859	0.172249	NA
ML11_055	GEN3_C146	3	GEN3_C146_I003	G07	259.377	6.55406	9.63145	17.9986	0.172249	NA
ML11_056	GEN3_C146	4	GEN3_C146_I004	G07	263.013	6.82025	NA	23.1551	0.172249	NA
ML11_057	GEN3_C146	5	GEN3_C146_I005	G07	317.556	6.39287	NA	18.8333	0.172249	23.4921
ML09_238	GEN3_C147	1	GEN3_C147_I001	G07	311.011	6.708	13.6288	20.6476	0.172249	22.836
ML09_239	GEN3_C147	2	GEN3_C147_I002	G07	286.285	6.57797	11.602	19.8341	0.172249	22.836
ML09_240	GEN3_C147	3	GEN3_C147_I003	G07	301.557	6.63961	10.9827	19.5901	0.172249	24.1481
ML10_193	GEN3_C147	4	GEN3_C147_I004	G07	287.739	6.73487	10.7012	21.9526	0.172249	NA
ML09_033	GEN3_C148	1	GEN3_C148_I001	G07	281.194	6.24243	NA	17.9986	0.172249	30.7085
ML09_034	GEN3_C148	2	GEN3_C148_I002	G07	241.196	6.40169	NA	16.0145	0.392394	30.0525
ML09_035	GEN3_C148	3	GEN3_C148_I003	G07	224.469	5.85137	NA	17.1003	0.172249	32.6767
ML09_036	GEN3_C148	4	GEN3_C148_I004	G07	192.47	5.47429	NA	13.1781	0.392394	29.3965
ML09_037	GEN3_C148	5	GEN3_C148_I005	G07	283.376	6.15842	NA	17.5176	0.172249	35.9569
ML11_018	GEN3_C149	1	GEN3_C149_I001	G07	293.557	7.07402	12.3339	20.5238	0.392394	24.1481
ML11_019	GEN3_C149	2	GEN3_C149_I002	G07	268.104	6.16391	9.06844	17.1569	0.311145	NA
ML11_020	GEN3_C149	3	GEN3_C149_I003	G07	303.739	6.83853	NA	18.3806	0.392394	25.4602
ML11_021	GEN3_C149	4	GEN3_C149_I004	G07	286.285	6.70822	13.9666	21.3266	0.172249	20.8679
ML11_022	GEN3_C149	5	GEN3_C149_I005	G07	283.376	6.97915	NA	24.0499	0.311145	NA
ML09_093	GEN3_C150	1	GEN3_C150_I001	G07	286.285	6.68727	11.7709	21.9738	0.172249	26.1162
ML09_094	GEN3_C150	2	GEN3_C150_I002	G07	355.373	6.87132	NA	23.6148	0.172249	29.3965
ML09_095	GEN3_C150	3	GEN3_C150_I003	G07	323.374	6.95548	NA	23.0702	0.172249	28.0844
ML09_096	GEN3_C150	4	GEN3_C150_I004	G07	332.829	6.96883	NA	22.6423	0.172249	27.4283
ML09_097	GEN3_C150	5	GEN3_C150_I005	G07	312.466	6.96142	10.0256	24.1772	0.172249	26.1162
ML01_206	GEN3_C151	1	GEN3_C151_I001	G08	300.995	6.54163	10.4726	19.2294	0.180621	33.3131
ML01_207	GEN3_C151	2	GEN3_C151_I002	G08	301.722	6.34377	13.5691	19.5866	0.319517	28.7208
ML01_208	GEN3_C151	3	GEN3_C151_I003	G08	305.358	6.91138	12.2742	21.9597	0.319517	29.3768
ML01_209	GEN3_C151	4	GEN3_C151_I004	G08	263.906	6.73133	14.0196	21.6202	0.180621	24.1285
ML09_159	GEN3_C152	1	GEN3_C152_I001	G08	312.631	6.28955	NA	18.3487	0.180621	32.001
ML09_160	GEN3_C152	2	GEN3_C152_I002	G08	289.359	6.14124	9.51546	19.1374	0.180621	32.001
ML09_161	GEN3_C152	3	GEN3_C152_I003	G08	260.997	6.64695	13.4002	20.5132	0.180621	26.0966
ML09_162	GEN3_C152	4	GEN3_C152_I004	G08	308.267	6.86127	13.0061	20.6157	0.180621	28.7208
ML09_163	GEN3_C152	5	GEN3_C152_I005	G08	250.815	6.04126	11.2608	17.2453	0.180621	28.0647
ML08_170	GEN3_C153	1	GEN3_C153_I001	G08	236.997	6.08779	7.54493	18.2143	0.180621	27.4087
ML08_171	GEN3_C153	2	GEN3_C153_I002	G08	294.45	6.85228	13.1187	21.6944	0.180621	30.6889
ML08_172	GEN3_C153	3	GEN3_C153_I003	G08	281.359	6.38005	11.1482	18.6883	0.180621	28.0647
ML08_173	GEN3_C153	4	GEN3_C153_I004	G08	274.814	6.15055	10.5289	18.5256	0.180621	35.2812
ML08_174	GEN3_C153	5	GEN3_C153_I005	G08	281.359	6.51664	12.7246	18.6104	0.180621	34.6251
ML02_212	GEN3_C154	1	GEN3_C154_I001	G08	347.539	6.97278	11.5423	23.1268	0.180621	NA
ML02_213	GEN3_C154	2	GEN3_C154_I002	G08	308.267	6.76418	11.486	21.1392	0.180621	29.3768
ML02_214	GEN3_C154	3	GEN3_C154_I003	G08	271.905	6.69485	13.3439	19.5724	0.180621	21.5043
ML02_216	GEN3_C154	4	GEN3_C154_I004	G08	329.358	6.73985	12.1616	21.6944	0.180621	24.7845
ML11_068	GEN3_C155	1	GEN3_C155_I001	G08	311.904	6.57697	11.7112	20.4354	0.319517	28.7208
ML11_071	GEN3_C155	2	GEN3_C155_I002	G08	165.727	6.04438	7.48863	17.2135	0.319517	28.0647
ML08_236	GEN3_C156	1	GEN3_C156_I001	G08	196.999	5.76297	8.33314	15.9862	0.180621	21.5043
ML08_237	GEN3_C156	2	GEN3_C156_I002	G08	242.088	6.46147	9.96587	19.385	0.180621	22.8164
ML08_238	GEN3_C156	3	GEN3_C156_I003	G08	173	5.1834	NA	14.3275	0.180621	26.0966
ML08_239	GEN3_C156	4	GEN3_C156_I004	G08	218.089	6.14181	6.3626	20.7325	0.180621	26.7526
ML09_004	GEN3_C157	1	GEN3_C157_I001	G08	317.722	7.16625	10.8667	21.698	0.319517	26.7526
ML09_006	GEN3_C157	2	GEN3_C157_I002	G08	308.267	6.40311	11.8801	19.6891	0.180621	30.0329
ML09_007	GEN3_C157	3	GEN3_C157_I003	G08	333.721	6.34096	12.5557	20.5698	0.180621	28.7208
ML09_088	GEN3_C158	1	GEN3_C158_I001	G08	308.102	6.80278	12.8969	20.7643	0.172249	NA
ML09_089	GEN3_C158	2	GEN3_C158_I002	G08	319.011	6.43437	11.3768	19.4875	0.172249	25.4602
ML09_090	GEN3_C158	3	GEN3_C158_I003	G08	337.919	6.83214	13.5162	23.2117	0.172249	31.3646
ML09_091	GEN3_C158	4	GEN3_C158_I004	G08	300.103	6.31126	7.26681	17.8005	0.172249	26.7723
ML09_092	GEN3_C158	5	GEN3_C158_I005	G08	247.014	5.9234	10.3071	17.698	0.172249	30.7085
ML09_008	GEN3_C159	1	GEN3_C159_I001	G08	296.466	6.53717	9.96926	20.8279	0.172249	NA
ML09_009	GEN3_C159	2	GEN3_C159_I002	G08	337.192	6.69967	11.3205	22.7873	0.172249	24.1481
ML09_010	GEN3_C159	3	GEN3_C159_I003	G08	337.919	6.51784	NA	20.9906	0.172249	27.4283
ML09_012	GEN3_C159	4	GEN3_C159_I004	G08	319.011	6.46279	11.6583	18.515	0.172249	24.8042
ML11_038	GEN3_C160	1	GEN3_C160_I001	G08	331.374	6.68757	9.74406	21.5388	0.172249	32.0206
ML11_039	GEN3_C160	2	GEN3_C160_I002	G08	314.647	6.73678	10.6449	21.5282	0.172249	32.0206
ML11_040	GEN3_C160	3	GEN3_C160_I003	G08	312.466	6.87853	11.7709	23.8129	0.172249	NA
ML11_041	GEN3_C160	4	GEN3_C160_I004	G08	324.829	6.84718	13.0095	22.5751	0.172249	32.0206
ML11_042	GEN3_C160	5	GEN3_C160_I005	G08	303.012	7.03626	10.7575	24.644	0.172249	NA
ML09_013	GEN3_C161	1	GEN3_C161_I001	G08	300.83	6.70822	13.0658	21.7864	0.172249	24.8042
ML09_015	GEN3_C161	2	GEN3_C161_I002	G08	249.195	6.03128	11.3205	15.8412	0.172249	29.3965
ML09_016	GEN3_C161	3	GEN3_C161_I003	G08	285.558	6.48608	15.2616	19.7846	0.172249	26.7723
ML09_017	GEN3_C161	4	GEN3_C161_I004	G08	297.921	6.70064	12.6154	20.2515	0.172249	26.1162
ML08_120	GEN3_C162	1	GEN3_C162_I001	G08	271.013	6.59649	13.6288	19.8836	0.311145	22.18
ML08_121	GEN3_C162	2	GEN3_C162_I002	G08	292.103	6.61381	NA	17.5211	0.311145	29.3965
ML08_122	GEN3_C162	3	GEN3_C162_I003	G08	257.195	5.94406	NA	18.4478	0.172249	27.4283
ML08_123	GEN3_C162	4	GEN3_C162_I004	G08	253.559	6.59253	13.1784	18.713	0.311145	27.4283
ML08_124	GEN3_C162	5	GEN3_C162_I005	G08	291.376	6.58121	10.6449	18.95	0.172249	26.7723
ML11_008	GEN3_C163	1	GEN3_C163_I001	G08	228.105	6.25959	10.3634	18.5857	0.311145	29.3965
ML11_009	GEN3_C163	2	GEN3_C163_I002	G08	185.925	5.53268	NA	15.3779	0.172249	26.1162
ML11_012	GEN3_C163	3	GEN3_C163_I003	G08	278.285	7.41881	12.5591	19.7846	0.392394	30.0525
ML05_232	GEN3_C164	1	GEN3_C164_I001	G08	295.012	6.33648	NA	20.1383	0.172249	30.0525
ML05_233	GEN3_C164	2	GEN3_C164_I002	G08	249.923	6.11593	NA	17.2771	0.172249	32.0206
ML05_234	GEN3_C164	3	GEN3_C164_I003	G08	312.466	6.99337	NA	22.3593	0.172249	29.3965
ML05_235	GEN3_C164	4	GEN3_C164_I004	G08	319.011	7.13792	12.2213	24.1347	0.172249	29.3965
ML10_215	GEN3_C165	1	GEN3_C165_I001	G08	204.106	5.79249	10.0819	15.8907	0.172249	26.1162
ML10_217	GEN3_C165	2	GEN3_C165_I002	G08	209.197	6.65799	15.0927	19.7669	0.172249	20.8679
ML10_218	GEN3_C165	3	GEN3_C165_I003	G08	219.378	6.04453	13.4036	15.1516	0.172249	26.7723
ML10_219	GEN3_C165	4	GEN3_C165_I004	G08	229.56	6.55528	14.5859	20.6794	0.172249	23.4921
ML04_207	GEN3_C166	1	GEN3_C166_I001	G08	305.921	6.71557	9.80036	19.6891	0.311145	26.7723
ML04_208	GEN3_C166	2	GEN3_C166_I002	G08	244.832	6.22199	9.12474	19.4027	0.172249	24.8042
ML04_209	GEN3_C166	3	GEN3_C166_I003	G08	293.557	6.90358	11.0953	22.7554	0.172249	24.8042
ML04_210	GEN3_C166	4	GEN3_C166_I004	G08	292.83	6.51943	14.3044	22.6918	0.172249	29.3965
ML11_028	GEN3_C167	1	GEN3_C167_I001	G09	252.27	6.5133	11.3171	22.6423	0.180621	22.1603
ML11_029	GEN3_C167	2	GEN3_C167_I002	G09	295.177	6.57491	11.0919	20.1772	0.180621	28.7208
ML11_031	GEN3_C167	3	GEN3_C167_I003	G09	257.36	6.41842	14.9204	20.9906	0.180621	25.4406
ML11_032	GEN3_C167	4	GEN3_C167_I004	G09	259.542	6.62593	13.5128	21.8359	0.180621	23.4724
ML10_121	GEN3_C168	1	GEN3_C168_I001	G09	308.267	6.66952	NA	19.9049	0.180621	24.7845
ML10_122	GEN3_C168	2	GEN3_C168_I002	G09	274.814	6.48559	15.596	19.3602	0.180621	21.5043
ML10_123	GEN3_C168	3	GEN3_C168_I003	G09	280.632	6.4797	NA	16.6016	0.180621	NA
ML10_124	GEN3_C168	4	GEN3_C168_I004	G09	300.995	6.77033	12.4431	19.8412	0.180621	NA
ML10_125	GEN3_C168	5	GEN3_C168_I005	G09	296.632	6.92603	15.033	19.194	0.400767	24.1285
ML08_226	GEN3_C169	1	GEN3_C169_I001	G09	276.996	6.30267	9.96587	18.1825	0.180621	29.3768
ML08_227	GEN3_C169	2	GEN3_C169_I002	G09	302.449	6.42203	10.6978	17.7227	0.180621	29.3768
ML08_229	GEN3_C169	3	GEN3_C169_I003	G09	295.904	6.28388	13.0624	16.9942	0.180621	25.4406
ML08_230	GEN3_C169	4	GEN3_C169_I004	G09	338.812	6.4319	NA	19.3602	0.180621	33.3131
ML11_058	GEN3_C170	1	GEN3_C170_I001	G09	303.177	6.60638	15.7649	19.0455	0.180621	28.7208
ML11_059	GEN3_C170	2	GEN3_C170_I002	G09	275.541	6.57589	15.1456	18.8509	0.180621	32.001
ML11_060	GEN3_C170	3	GEN3_C170_I003	G09	282.087	6.42091	10.1348	17.408	0.319517	32.001
ML11_061	GEN3_C170	4	GEN3_C170_I004	G09	306.086	6.79377	12.3868	18.4831	0.180621	25.4406
ML10_102	GEN3_C171	1	GEN3_C171_I001	G09	295.904	6.90632	10.36	23.3637	0.180621	25.4406
ML10_103	GEN3_C171	2	GEN3_C171_I002	G09	203.544	7.17467	7.43232	21.5777	0.400767	NA
ML10_105	GEN3_C171	3	GEN3_C171_I003	G09	309.722	6.50251	13.175	20.4318	0.180621	33.9691
ML10_106	GEN3_C171	4	GEN3_C171_I004	G09	327.903	6.91208	11.8801	21.171	0.180621	NA
ML11_152	GEN3_C172	1	GEN3_C172_I001	G09	305.358	7.25024	7.99533	21.3443	0.400767	27.4087
ML11_153	GEN3_C172	2	GEN3_C172_I002	G09	287.905	6.13508	NA	19.9119	0.180621	30.6889
ML11_154	GEN3_C172	3	GEN3_C172_I003	G09	293.723	6.65733	11.9364	21.1038	0.180621	25.4406
ML11_155	GEN3_C172	4	GEN3_C172_I004	G09	282.087	6.45109	10.4163	19.9827	0.180621	26.7526
ML09_224	GEN3_C173	1	GEN3_C173_I001	G09	199.181	5.43504	9.96587	15.1905	0.180621	20.8483
ML09_225	GEN3_C173	2	GEN3_C173_I002	G09	294.45	6.46846	10.4726	19.6432	0.180621	32.001
ML09_227	GEN3_C173	3	GEN3_C173_I003	G09	268.269	6.45406	10.6415	19.0879	0.180621	29.3768
ML11_034	GEN3_C174	1	GEN3_C174_I001	G09	311.904	6.11685	NA	18.1684	0.180621	26.0966
ML11_035	GEN3_C174	2	GEN3_C174_I002	G09	306.086	5.88702	NA	17.1852	0.180621	28.0647
ML11_036	GEN3_C174	3	GEN3_C174_I003	G09	332.266	6.87703	12.612	23.3107	0.180621	26.7526
ML11_037	GEN3_C174	4	GEN3_C174_I004	G09	306.086	6.98283	10.5852	21.6095	0.180621	NA
ML10_036	GEN3_C175	1	GEN3_C175_I001	G09	268.996	6.8367	NA	20.4318	0.319517	NA
ML10_037	GEN3_C175	2	GEN3_C175_I002	G09	305.358	6.45085	11.8238	17.8218	0.180621	27.4087
ML09_154	GEN3_C176	1	GEN3_C176_I001	G09	330.812	6.45819	11.5986	20.1524	0.180621	29.3768
ML09_156	GEN3_C176	2	GEN3_C176_I002	G09	310.449	6.7956	10.6978	20.5768	0.180621	27.4087
ML09_158	GEN3_C176	3	GEN3_C176_I003	G09	305.358	6.78151	9.57177	21.5176	0.180621	30.0329
ML05_241	GEN3_C177	1	GEN3_C177_I001	G09	271.178	6.28802	9.96587	18.469	0.180621	26.7526
ML05_242	GEN3_C177	2	GEN3_C177_I002	G09	237.725	5.91364	NA	18.2957	0.180621	26.0966
ML05_243	GEN3_C177	3	GEN3_C177_I003	G09	287.177	7.00563	9.96587	23.0278	0.180621	NA
ML05_244	GEN3_C177	4	GEN3_C177_I004	G09	270.451	6.64686	13.0061	21.5706	0.180621	30.0329
ML06_241	GEN3_C177	5	GEN3_C177_I005	G09	268.996	6.40067	NA	21.1851	0.180621	19.5362
ML09_123	GEN3_C178	1	GEN3_C178_I001	G09	337.919	7.07077	10.9264	21.9703	0.311145	34.6448
ML09_124	GEN3_C178	2	GEN3_C178_I002	G09	222.287	6.32977	9.57515	14.4725	0.172249	NA
ML09_127	GEN3_C178	3	GEN3_C178_I003	G09	340.828	6.8624	11.039	21.4469	0.172249	33.3327
ML10_028	GEN3_C179	1	GEN3_C179_I001	G09	271.013	6.34144	8.44913	18.9252	0.172249	24.8042
ML10_029	GEN3_C179	2	GEN3_C179_I002	G09	275.376	6.25457	8.89954	19.1162	0.172249	28.0844
ML10_030	GEN3_C179	3	GEN3_C179_I003	G09	286.285	6.51457	11.039	21.3726	0.172249	28.0844
ML10_087	GEN3_C180	1	GEN3_C180_I001	G09	337.919	7.08014	11.7146	20.5026	0.311145	28.0844
ML10_088	GEN3_C180	2	GEN3_C180_I002	G09	329.192	6.71161	10.7012	19.3249	0.311145	33.9888
ML10_089	GEN3_C180	3	GEN3_C180_I003	G09	311.739	6.3624	9.40625	17.9632	0.172249	28.0844
ML10_091	GEN3_C180	4	GEN3_C180_I004	G09	298.648	6.79823	10.8701	20.6865	0.172249	NA
ML11_082	GEN3_C181	1	GEN3_C181_I001	G09	222.287	5.96826	NA	16.5733	0.311145	23.4921
ML11_083	GEN3_C181	2	GEN3_C181_I002	G09	292.83	7.33252	NA	18.0693	0.172249	23.4921
ML11_084	GEN3_C181	3	GEN3_C181_I003	G09	286.285	7.22824	NA	16.3929	0.450042	31.3646
ML11_085	GEN3_C181	4	GEN3_C181_I004	G09	232.469	5.93612	10.0256	17.2948	0.172249	26.7723
ML11_086	GEN3_C181	5	GEN3_C181_I005	G09	235.378	7.26099	NA	17.5176	0.311145	23.4921
ML03_241	GEN3_C182	1	GEN3_C182_I001	G09	323.374	6.83196	11.1516	23.9508	0.172249	22.18
ML03_242	GEN3_C182	2	GEN3_C182_I002	G09	297.194	6.73473	NA	22.3027	0.172249	18.2437
ML03_243	GEN3_C182	3	GEN3_C182_I003	G09	231.014	6.56401	NA	20.591	0.311145	17.5877
ML04_241	GEN3_C182	4	GEN3_C182_I004	G09	284.103	6.71264	NA	21.1639	0.172249	NA
ML04_243	GEN3_C183	1	GEN3_C183_I001	G09	357.555	6.78345	9.91296	21.553	0.172249	29.3965
ML04_244	GEN3_C183	2	GEN3_C183_I002	G09	335.738	7.19748	10.0256	26.6246	0.172249	30.0525
ML10_195	GEN3_C184	1	GEN3_C184_I001	G09	145.2	5.32606	NA	20.9942	0.172249	15.6196
ML10_196	GEN3_C184	2	GEN3_C184_I002	G09	302.284	6.85584	12.728	20.6935	0.311145	NA
ML10_197	GEN3_C184	3	GEN3_C184_I003	G09	315.375	6.52728	NA	20.2727	0.172249	33.3327
ML10_199	GEN3_C184	4	GEN3_C184_I004	G09	299.375	6.07164	NA	17.5494	0.311145	NA
ML11_225	GEN3_C185	1	GEN3_C185_I001	G09	327.011	7.4733	14.6986	22.5114	0.172249	26.7723
ML11_226	GEN3_C185	2	GEN3_C185_I002	G09	258.65	7.26766	16.6691	17.5459	0.172249	30.0525
ML11_228	GEN3_C185	3	GEN3_C185_I003	G09	302.284	7.29656	NA	19.0985	0.172249	29.3965
ML09_051	GEN3_C186	1	GEN3_C186_I001	G09	266.649	6.08198	13.1221	15.4769	0.172249	27.4283
ML11_078	GEN3_C187	1	GEN3_C187_I001	G10	269.723	6.46427	12.8372	18.0941	0.180621	32.657
ML11_079	GEN3_C187	2	GEN3_C187_I002	G10	290.086	6.45358	9.12136	19.9933	0.180621	36.5933
ML11_080	GEN3_C187	3	GEN3_C187_I003	G10	286.45	6.38507	8.55835	19.5618	0.180621	37.9054
ML06_199	GEN3_C188	1	GEN3_C188_I001	G10	268.269	6.0983	NA	17.3974	0.180621	30.6889
ML06_200	GEN3_C188	2	GEN3_C188_I002	G10	239.179	6.09399	NA	17.3337	0.180621	28.0647
ML06_201	GEN3_C188	3	GEN3_C188_I003	G10	229.725	6.00711	NA	17.0331	0.180621	29.3768
ML06_202	GEN3_C188	4	GEN3_C188_I004	G10	279.905	6.0388	NA	17.3125	0.180621	33.3131
ML06_203	GEN3_C188	5	GEN3_C188_I005	G10	287.177	5.82593	NA	17.3974	0.180621	35.9372
ML11_013	GEN3_C189	1	GEN3_C189_I001	G10	300.995	6.30013	9.68437	20.0039	0.180621	31.3449
ML11_015	GEN3_C189	2	GEN3_C189_I002	G10	303.177	6.42389	9.68437	20.0852	0.180621	28.0647
ML11_016	GEN3_C189	3	GEN3_C189_I003	G10	290.086	6.58833	11.7675	18.0693	0.180621	26.0966
ML11_017	GEN3_C189	4	GEN3_C189_I004	G10	267.542	6.46788	11.8238	20.1312	0.180621	26.7526
ML05_217	GEN3_C190	1	GEN3_C190_I001	G10	284.996	6.81654	9.90957	21.4893	0.180621	26.7526
ML05_218	GEN3_C190	2	GEN3_C190_I002	G10	318.449	7.30821	13.2313	25.5529	0.180621	33.3131
ML05_220	GEN3_C190	3	GEN3_C190_I003	G10	354.811	7.3486	13.175	27.3849	0.180621	32.657
ML05_221	GEN3_C190	4	GEN3_C190_I004	G10	312.631	7.30511	13.2313	25.3867	0.180621	34.6251
ML11_043	GEN3_C191	1	GEN3_C191_I001	G10	276.269	6.69379	12.6683	20.637	0.180621	26.7526
ML11_044	GEN3_C191	2	GEN3_C191_I002	G10	240.634	6.9643	7.03822	20.3576	0.400767	33.3131
ML11_045	GEN3_C191	3	GEN3_C191_I003	G10	267.542	6.87044	NA	22.4902	0.180621	25.4406
ML11_046	GEN3_C191	4	GEN3_C191_I004	G10	288.632	6.84655	7.26342	23.4557	0.180621	25.4406
ML11_047	GEN3_C191	5	GEN3_C191_I005	G10	306.086	6.69059	9.74067	23.0454	0.180621	25.4406
ML10_135	GEN3_C192	1	GEN3_C192_I001	G10	214.453	4.26222	8.10794	16.9164	0.180621	26.7526
ML10_137	GEN3_C192	2	GEN3_C192_I002	G10	220.271	5.61173	7.93903	16.0181	0.180621	24.7845
ML10_138	GEN3_C192	3	GEN3_C192_I003	G10	319.176	6.4822	NA	19.7104	0.180621	26.0966
ML10_139	GEN3_C192	4	GEN3_C192_I004	G10	261.724	6.12002	NA	18.1754	0.180621	39.2174
ML01_217	GEN3_C193	1	GEN3_C193_I001	G10	260.997	5.67431	NA	17.744	0.180621	32.657
ML01_218	GEN3_C193	2	GEN3_C193_I002	G10	279.905	6.82623	12.2179	19.8943	0.319517	28.7208
ML06_194	GEN3_C194	1	GEN3_C194_I001	G10	261.724	7.02007	NA	21.4469	0.180621	27.4087
ML06_195	GEN3_C194	2	GEN3_C194_I002	G10	232.634	7.15273	NA	20.69	0.458414	29.3768
ML06_197	GEN3_C194	3	GEN3_C194_I003	G10	293.723	7.07034	NA	23.0667	0.319517	26.0966
ML06_198	GEN3_C194	4	GEN3_C194_I004	G10	313.358	7.27339	NA	21.072	0.319517	35.2812
ML01_201	GEN3_C195	1	GEN3_C195_I001	G10	191.181	6.03204	8.78355	19.0631	0.180621	26.7526
ML01_204	GEN3_C195	2	GEN3_C195_I002	G10	191.181	5.90955	11.1482	20.5698	0.180621	32.001
ML11_220	GEN3_C196	1	GEN3_C196_I001	G10	316.829	6.35123	NA	16.6299	0.172249	26.1162
ML11_221	GEN3_C196	2	GEN3_C196_I002	G10	313.92	6.28232	NA	18.2532	0.172249	36.6129
ML11_222	GEN3_C196	3	GEN3_C196_I003	G10	199.743	5.8522	11.3768	14.6458	0.311145	30.7085
ML04_201	GEN3_C197	1	GEN3_C197_I001	G10	220.833	5.81272	NA	16.2303	0.172249	35.3008
ML04_202	GEN3_C197	2	GEN3_C197_I002	G10	198.288	6.17222	8.44913	15.4345	0.311145	30.0525
ML04_203	GEN3_C197	3	GEN3_C197_I003	G10	317.556	6.54348	NA	21.5848	0.172249	29.3965
ML04_204	GEN3_C197	4	GEN3_C197_I004	G10	324.829	7.19231	11.9398	22.6246	0.311145	25.4602
ML04_205	GEN3_C197	5	GEN3_C197_I005	G10	302.284	6.3426	13.9103	19.8589	0.172249	NA
ML10_220	GEN3_C198	1	GEN3_C198_I001	G10	302.284	6.67314	NA	20.3859	0.172249	14.9635
ML10_221	GEN3_C198	2	GEN3_C198_I002	G10	327.738	6.7638	NA	20.4	0.172249	28.7404
ML10_222	GEN3_C198	3	GEN3_C198_I003	G10	338.647	6.56151	NA	21.4186	0.172249	36.6129
ML10_223	GEN3_C198	4	GEN3_C198_I004	G10	327.011	6.83901	NA	23.6325	0.172249	16.9317
ML10_224	GEN3_C198	5	GEN3_C198_I005	G10	320.465	6.32433	NA	19.1445	0.172249	33.3327
ML08_086	GEN3_C199	1	GEN3_C199_I001	G10	267.377	7.25115	NA	21.4964	0.392394	NA
ML08_087	GEN3_C199	2	GEN3_C199_I002	G10	258.65	6.92182	NA	18.7413	0.392394	28.0844
ML08_089	GEN3_C199	3	GEN3_C199_I003	G10	252.832	7.28734	10.476	21.0472	0.392394	NA
ML08_090	GEN3_C199	4	GEN3_C199_I004	G10	320.465	6.84563	9.40625	22.3416	0.172249	26.1162
ML06_242	GEN3_C200	1	GEN3_C200_I001	G10	289.194	6.27732	13.6851	20.9942	0.172249	29.3965
ML06_243	GEN3_C200	2	GEN3_C200_I002	G10	259.377	6.10723	NA	18.2957	0.172249	33.3327
ML06_244	GEN3_C200	3	GEN3_C200_I003	G10	322.647	6.37757	10.8701	19.0207	0.172249	35.9569
ML10_233	GEN3_C200	4	GEN3_C200_I004	G10	303.012	5.99292	8.95584	15.8483	0.172249	31.3646
ML10_234	GEN3_C200	5	GEN3_C200_I005	G10	317.556	6.14239	NA	19.9367	0.172249	35.3008
ML08_232	GEN3_C201	1	GEN3_C201_I001	G10	265.195	6.09615	11.4894	18.9217	0.172249	28.0844
ML08_233	GEN3_C201	2	GEN3_C201_I002	G10	264.468	5.98082	NA	18.1295	0.172249	30.0525
ML08_234	GEN3_C201	3	GEN3_C201_I003	G10	193.925	6.01774	NA	20.5415	0.172249	26.7723
ML08_235	GEN3_C201	4	GEN3_C201_I004	G10	184.471	5.9578	6.19709	19.3284	0.172249	23.4921
ML06_204	GEN3_C202	1	GEN3_C202_I001	G10	225.924	5.60789	8.05502	16.6193	0.311145	39.8931
ML06_206	GEN3_C202	2	GEN3_C202_I002	G10	329.192	6.59253	NA	20.0428	0.172249	34.6448
ML06_207	GEN3_C202	3	GEN3_C202_I003	G10	253.559	5.78245	NA	15.8766	0.172249	31.3646
ML06_208	GEN3_C202	4	GEN3_C202_I004	G10	263.74	6.05753	10.7012	17.9845	0.172249	33.3327
ML08_108	GEN3_C203	1	GEN3_C203_I001	G10	243.378	5.5487	NA	15.141	0.172249	30.7085
ML08_110	GEN3_C203	2	GEN3_C203_I002	G10	268.831	5.89461	NA	14.9181	0.172249	35.3008
ML08_145	GEN3_C204	1	GEN3_C204_I001	G10	287.739	6.83877	7.15421	22.034	0.172249	NA
ML08_146	GEN3_C204	2	GEN3_C204_I002	G10	225.196	7.24749	9.74406	22.0693	0.172249	NA
ML08_147	GEN3_C204	3	GEN3_C204_I003	G10	267.377	6.88802	NA	23.3178	0.172249	NA
ML08_148	GEN3_C204	4	GEN3_C204_I004	G10	268.104	7.35366	13.4036	21.1392	0.172249	22.18
ML08_149	GEN3_C204	5	GEN3_C204_I005	G10	278.285	7.45637	9.91296	22.1259	0.172249	NA
ML09_233	GEN3_C205	1	GEN3_C205_I001	G10	278.285	6.27272	9.12474	19.9119	0.172249	28.7404
ML09_234	GEN3_C205	2	GEN3_C205_I002	G10	289.921	7.23198	NA	17.744	0.311145	22.18
ML09_235	GEN3_C205	3	GEN3_C205_I003	G10	268.104	5.94526	NA	19.5477	0.172249	32.6767
ML09_236	GEN3_C205	4	GEN3_C205_I004	G10	219.378	7.2232	NA	16.6971	0.311145	26.1162
ML10_145	GEN3_C206	1	GEN3_C206_I001	G10	313.92	6.24031	NA	17.4292	0.311145	33.9888
ML10_146	GEN3_C206	2	GEN3_C206_I002	G10	335.738	6.69145	NA	22.5008	0.172249	27.4283
ML10_147	GEN3_C206	3	GEN3_C206_I003	G10	321.92	6.68841	NA	19.6608	0.311145	29.3965
ML10_148	GEN3_C206	4	GEN3_C206_I004	G10	299.375	6.76597	12.728	19.1763	0.311145	21.524
ML10_150	GEN3_C207	1	GEN3_C207_I001	G10	335.738	6.99873	NA	23.6573	0.311145	30.7085
ML10_151	GEN3_C207	2	GEN3_C207_I002	G10	275.376	6.2483	9.74406	19.293	0.172249	30.7085
ML10_152	GEN3_C207	3	GEN3_C207_I003	G10	227.378	5.82577	NA	18.2815	0.172249	22.836
ML10_153	GEN3_C207	4	GEN3_C207_I004	G10	279.013	6.67213	13.7977	23.095	0.172249	20.8679
ML10_154	GEN3_C207	5	GEN3_C207_I005	G10	342.283	7.01105	NA	23.0808	0.311145	29.3965
ML03_224	GEN3_C208	1	GEN3_C208_I001	G10	221.56	6.05893	12.6717	17.7687	0.172249	25.4602
ML03_225	GEN3_C208	2	GEN3_C208_I002	G10	303.739	7.37852	11.7709	22.0658	0.172249	34.6448
ML03_226	GEN3_C208	3	GEN3_C208_I003	G10	295.012	7.43342	11.0953	23.6785	0.172249	33.3327
ML03_227	GEN3_C208	4	GEN3_C208_I004	G10	255.013	7.21491	NA	20.2055	0.172249	28.7404
ML03_228	GEN3_C208	5	GEN3_C208_I005	G10	304.466	6.27574	9.34995	20.2232	0.172249	23.4921
ML09_193	GEN3_C209	1	GEN3_C209_I001	G10	281.921	6.41598	11.4894	17.2877	0.172249	30.7085
ML09_194	GEN3_C209	2	GEN3_C209_I002	G10	282.649	6.49701	9.51885	20.835	0.172249	24.1481
ML09_195	GEN3_C209	3	GEN3_C209_I003	G10	270.286	6.0845	8.89954	16.7678	0.172249	23.4921
ML09_196	GEN3_C209	4	GEN3_C209_I004	G10	250.65	5.89564	8.89954	16.3576	0.172249	28.0844
ML09_197	GEN3_C209	5	GEN3_C209_I005	G10	275.376	6.65471	8.39283	21.9915	0.172249	27.4283
ML05_199	GEN3_C210	1	GEN3_C210_I001	G10	217.197	5.81418	NA	15.5583	0.172249	36.6129
ML05_201	GEN3_C210	2	GEN3_C210_I002	G10	180.834	5.64037	NA	14.5645	0.311145	30.0525
ML02_227	GEN3_C211	1	GEN3_C211_I001	G10	241.923	6.40441	11.1516	20.6794	0.172249	NA
ML02_228	GEN3_C211	2	GEN3_C211_I002	G10	279.74	6.43132	9.80036	22.1153	0.172249	25.4602
ML02_229	GEN3_C211	3	GEN3_C211_I003	G10	216.469	5.85578	NA	16.7431	0.172249	24.8042
ML02_230	GEN3_C211	4	GEN3_C211_I004	G10	249.195	5.94359	9.96926	18.3699	0.172249	26.1162
ML02_231	GEN3_C211	5	GEN3_C211_I005	G10	215.015	5.70083	9.06844	17.0048	0.172249	28.7404
ML08_193	GEN3_C212	1	GEN3_C212_I001	G11	283.541	6.69836	11.4297	20.8951	0.180621	30.0329
ML08_194	GEN3_C212	2	GEN3_C212_I002	G11	293.723	6.72916	13.0061	20.1029	0.180621	27.4087
ML08_196	GEN3_C212	3	GEN3_C212_I003	G11	291.541	6.81572	12.6683	22.0446	0.180621	30.6889
ML08_197	GEN3_C212	4	GEN3_C212_I004	G11	307.54	7.2076	15.3708	21.4504	0.319517	33.9691
ML08_125	GEN3_C213	1	GEN3_C213_I001	G11	262.451	6.48141	11.3171	17.7758	0.319517	28.0647
ML08_126	GEN3_C213	2	GEN3_C213_I002	G11	251.542	5.94467	10.7541	18.4407	0.180621	29.3768
ML08_127	GEN3_C213	3	GEN3_C213_I003	G11	226.816	5.75678	8.10794	16.4495	0.180621	25.4406
ML08_128	GEN3_C213	4	GEN3_C213_I004	G11	253.724	6.69133	14.0759	21.0543	0.180621	25.4406
ML08_129	GEN3_C213	5	GEN3_C213_I005	G11	217.362	6.64739	13.7943	18.9394	0.319517	23.4724
ML10_119	GEN3_C214	1	GEN3_C214_I001	G11	290.814	6.14715	8.67095	17.2736	0.180621	25.4406
ML08_180	GEN3_C215	1	GEN3_C215_I001	G11	295.904	6.53078	10.9793	19.4805	0.180621	26.0966
ML08_181	GEN3_C215	2	GEN3_C215_I002	G11	317.722	6.69256	9.17766	22.6882	0.180621	28.0647
ML08_182	GEN3_C215	3	GEN3_C215_I003	G11	301.722	6.74426	10.7541	22.3098	0.180621	29.3768
ML08_183	GEN3_C215	4	GEN3_C215_I004	G11	247.906	6.30267	9.79697	20.6971	0.180621	22.8164
ML08_184	GEN3_C215	5	GEN3_C215_I005	G11	282.814	6.27146	10.2474	17.9314	0.180621	24.1285
ML08_091	GEN3_C216	1	GEN3_C216_I001	G11	280.632	6.849	12.049	21.3903	0.319517	27.4087
ML08_092	GEN3_C216	2	GEN3_C216_I002	G11	278.45	6.77814	10.5852	21.6378	0.319517	23.4724
ML08_093	GEN3_C216	3	GEN3_C216_I003	G11	286.45	6.44211	NA	20.163	0.180621	24.1285
ML08_094	GEN3_C216	4	GEN3_C216_I004	G11	289.359	6.4583	10.6415	22.3487	0.661124	28.0647
ML08_095	GEN3_C216	5	GEN3_C216_I005	G11	276.996	5.63131	NA	18.4831	0.180621	21.5043
ML08_116	GEN3_C217	1	GEN3_C217_I001	G11	283.541	6.94822	14.6952	20.7325	0.319517	27.4087
ML08_117	GEN3_C217	2	GEN3_C217_I002	G11	280.632	6.90809	11.5986	23.2293	0.180621	27.4087
ML08_119	GEN3_C217	3	GEN3_C217_I003	G11	295.177	6.87044	13.0624	23.4628	0.180621	28.7208
ML11_214	GEN3_C218	1	GEN3_C218_I001	G11	302.449	6.41553	NA	18.0269	0.180621	27.4087
ML11_215	GEN3_C218	2	GEN3_C218_I002	G11	311.176	6.60205	10.6415	22.8474	0.180621	26.7526
ML11_216	GEN3_C218	3	GEN3_C218_I003	G11	293.723	6.97825	12.7246	25.2276	0.180621	27.4087
ML11_217	GEN3_C218	4	GEN3_C218_I004	G11	318.449	6.86354	9.34656	25.3938	0.180621	29.3768
ML10_082	GEN3_C219	1	GEN3_C219_I001	G11	300.995	6.77098	12.3305	21.7687	0.180621	26.0966
ML10_083	GEN3_C219	2	GEN3_C219_I002	G11	327.176	6.60965	10.4163	20.8633	0.180621	22.1603
ML05_227	GEN3_C220	1	GEN3_C220_I001	G11	279.178	6.84791	11.5986	21.7263	0.180621	NA
ML05_228	GEN3_C220	2	GEN3_C220_I002	G11	292.995	6.92357	10.6978	24.7749	0.180621	25.4406
ML05_229	GEN3_C220	3	GEN3_C220_I003	G11	285.723	6.85638	12.2742	21.8571	0.180621	25.4406
ML05_230	GEN3_C220	4	GEN3_C220_I004	G11	265.36	6.47537	10.9793	18.2851	0.180621	26.0966
ML10_141	GEN3_C221	1	GEN3_C221_I001	G11	281.921	6.50474	11.4894	22.7307	0.311145	26.7723
ML10_142	GEN3_C221	2	GEN3_C221_I002	G11	255.013	6.4689	9.29365	22.6635	0.172249	22.18
ML10_144	GEN3_C221	3	GEN3_C221_I003	G11	308.102	7.17299	11.0953	23.1268	0.311145	23.4921
ML09_063	GEN3_C222	1	GEN3_C222_I001	G11	317.556	6.92209	12.3902	22.8863	0.172249	35.3008
ML09_064	GEN3_C222	2	GEN3_C222_I002	G11	330.647	6.79234	10.5323	24.3505	0.172249	32.6767
ML09_065	GEN3_C222	3	GEN3_C222_I003	G11	218.651	5.85495	7.94242	16.2762	0.172249	29.3965
ML09_066	GEN3_C222	4	GEN3_C222_I004	G11	266.649	6.55798	8.39283	22.9252	0.172249	NA
ML09_067	GEN3_C222	5	GEN3_C222_I005	G11	311.739	6.66459	13.7414	20.0039	0.172249	28.0844
ML09_018	GEN3_C223	1	GEN3_C223_I001	G11	295.012	6.85495	14.0229	21.7333	0.172249	30.0525
ML09_020	GEN3_C223	2	GEN3_C223_I002	G11	276.831	6.43098	13.3473	19.7033	0.172249	26.7723
ML09_021	GEN3_C223	3	GEN3_C223_I003	G11	292.103	6.56548	NA	20.9942	0.172249	22.18
ML09_022	GEN3_C223	4	GEN3_C223_I004	G11	255.741	6.05471	8.61803	19.2859	0.172249	28.0844
ML08_046	GEN3_C224	1	GEN3_C224_I001	G11	259.377	6.25412	12.7843	16.1843	0.172249	27.4283
ML08_047	GEN3_C224	2	GEN3_C224_I002	G11	279.74	6.82748	11.9961	20.0463	0.311145	28.7404
ML08_048	GEN3_C224	3	GEN3_C224_I003	G11	243.378	6.74786	10.476	19.3072	0.311145	32.6767
ML08_049	GEN3_C224	4	GEN3_C224_I004	G11	245.559	6.04227	8.05502	22.0552	0.172249	24.8042
ML08_050	GEN3_C224	5	GEN3_C224_I005	G11	287.739	7.08629	11.5457	22.9393	0.172249	29.3965
ML08_056	GEN3_C225	1	GEN3_C225_I001	G11	263.74	6.49353	11.2079	20.8103	0.172249	26.1162
ML08_057	GEN3_C225	2	GEN3_C225_I002	G11	265.922	6.27718	12.165	17.7086	0.172249	24.8042
ML08_058	GEN3_C225	3	GEN3_C225_I003	G11	295.012	6.47263	11.5457	21.0225	0.172249	27.4283
ML08_059	GEN3_C225	4	GEN3_C225_I004	G11	284.103	6.16731	NA	18.9712	0.172249	30.7085
ML08_060	GEN3_C225	5	GEN3_C225_I005	G11	302.284	6.49527	10.6449	18.9535	0.172249	21.524
ML09_028	GEN3_C226	1	GEN3_C226_I001	G11	268.831	5.9266	7.99872	17.744	0.172249	26.7723
ML09_029	GEN3_C226	2	GEN3_C226_I002	G11	263.74	6.2209	10.5323	19.5936	0.172249	26.7723
ML09_030	GEN3_C226	3	GEN3_C226_I003	G11	215.742	7.23086	10.5323	17.2877	0.172249	26.1162
ML09_031	GEN3_C226	4	GEN3_C226_I004	G11	273.195	6.05167	NA	18.6423	0.172249	28.0844
ML09_032	GEN3_C226	5	GEN3_C226_I005	G11	241.196	6.14027	12.728	20.3222	0.172249	26.1162
ML08_160	GEN3_C227	1	GEN3_C227_I001	G11	308.83	6.85596	12.165	16.3505	0.392394	30.0525
ML08_161	GEN3_C227	2	GEN3_C227_I002	G11	307.375	6.41039	NA	20.2833	0.172249	28.0844
ML08_162	GEN3_C227	3	GEN3_C227_I003	G11	290.648	6.10649	NA	19.3496	0.172249	25.4602
ML08_163	GEN3_C227	4	GEN3_C227_I004	G11	267.377	6.20699	7.94242	19.6078	0.311145	30.0525
ML08_164	GEN3_C227	5	GEN3_C227_I005	G11	300.83	6.12342	7.0416	18.6953	0.311145	NA
ML08_189	GEN3_C228	1	GEN3_C228_I001	G11	320.465	6.61585	11.4331	21.2417	0.172249	27.4283
ML08_051	GEN3_C229	1	GEN3_C229_I001	G11	269.558	6.20363	9.85666	19.2683	0.172249	26.1162
ML08_052	GEN3_C229	2	GEN3_C229_I002	G11	297.921	6.72211	12.8969	21.7263	0.172249	25.4602
ML08_053	GEN3_C229	3	GEN3_C229_I003	G11	271.013	6.27214	9.23735	20.2762	0.172249	27.4283
ML08_054	GEN3_C229	4	GEN3_C229_I004	G11	220.106	6.03794	7.77352	18.6069	0.172249	26.7723
ML08_055	GEN3_C229	5	GEN3_C229_I005	G11	281.921	6.34558	14.4733	17.8536	0.172249	25.4602
ML08_131	GEN3_C230	1	GEN3_C230_I001	G11	207.743	5.79159	8.67434	16.7678	0.172249	30.0525
ML08_132	GEN3_C230	2	GEN3_C230_I002	G11	286.285	6.79409	12.2213	22.9535	0.172249	22.836
ML08_133	GEN3_C230	3	GEN3_C230_I003	G11	279.013	6.74647	15.7683	20.7466	0.172249	26.1162
ML08_134	GEN3_C230	4	GEN3_C230_I004	G11	280.467	6.259	11.0953	18.8509	0.172249	36.6129
ML08_041	GEN3_C231	1	GEN3_C231_I001	G11	278.285	6.47189	9.96926	19.1091	0.172249	25.4602
ML08_042	GEN3_C231	2	GEN3_C231_I002	G11	236.832	7.28014	11.8835	16.301	0.311145	24.1481
ML08_043	GEN3_C231	3	GEN3_C231_I003	G11	286.285	6.26253	12.2213	17.56	0.172249	24.8042
ML08_044	GEN3_C231	4	GEN3_C231_I004	G11	300.103	6.55406	NA	21.5388	0.172249	NA
ML08_045	GEN3_C231	5	GEN3_C231_I005	G11	223.742	5.77659	NA	17.8925	0.172249	26.1162
ML03_214	GEN3_C232	1	GEN3_C232_I001	G12	242.088	6.75329	10.8104	20.8421	0.180621	NA
ML03_215	GEN3_C232	2	GEN3_C232_I002	G12	255.906	6.04304	8.55835	21.5706	0.319517	NA
ML03_216	GEN3_C232	3	GEN3_C232_I003	G12	257.36	6.8715	11.3171	22.278	0.180621	26.0966
ML03_217	GEN3_C232	4	GEN3_C232_I004	G12	227.543	6.88238	10.6415	21.6131	0.180621	NA
ML03_218	GEN3_C232	5	GEN3_C232_I005	G12	283.541	7.08937	10.4163	24.9835	0.180621	NA
ML03_205	GEN3_C233	1	GEN3_C233_I001	G12	267.542	6.20224	13.3439	17.9774	0.180621	22.1603
ML03_207	GEN3_C233	2	GEN3_C233_I002	G12	236.997	5.62202	13.0061	14.3452	0.180621	23.4724
ML03_208	GEN3_C233	3	GEN3_C233_I003	G12	288.632	5.97231	11.486	17.9809	0.180621	25.4406
ML03_234	GEN3_C234	1	GEN3_C234_I001	G12	324.994	7.2026	9.74067	21.4327	0.180621	NA
ML03_235	GEN3_C234	2	GEN3_C234_I002	G12	325.721	6.95975	8.10794	21.27	0.180621	NA
ML03_236	GEN3_C234	3	GEN3_C234_I003	G12	284.996	6.83853	10.4163	21.8253	0.180621	26.7526
ML03_237	GEN3_C234	4	GEN3_C234_I004	G12	263.906	6.86901	7.88273	21.5282	0.180621	NA
ML03_238	GEN3_C234	5	GEN3_C234_I005	G12	268.269	7.21664	NA	19.7563	0.319517	NA
ML07_221	GEN3_C235	1	GEN3_C235_I001	G12	234.088	7.01249	8.55835	22.1719	0.180621	NA
ML07_222	GEN3_C235	2	GEN3_C235_I002	G12	297.359	6.75337	7.09452	22.1507	0.180621	30.0329
ML07_223	GEN3_C235	3	GEN3_C235_I003	G12	302.449	6.90844	12.7246	20.6829	0.180621	28.7208
ML07_224	GEN3_C235	4	GEN3_C235_I004	G12	312.631	7.1118	11.5986	23.0242	0.180621	26.7526
ML07_225	GEN3_C235	5	GEN3_C235_I005	G12	291.541	6.91872	8.22054	20.8492	0.180621	29.3768
ML08_199	GEN3_C236	1	GEN3_C236_I001	G12	261.724	6.01413	6.53151	16.4814	0.180621	24.7845
ML08_200	GEN3_C236	2	GEN3_C236_I002	G12	281.359	6.47468	11.0356	18.7448	0.180621	26.7526
ML08_201	GEN3_C236	3	GEN3_C236_I003	G12	290.086	6.32931	8.61465	17.8218	0.180621	28.7208
ML08_202	GEN3_C236	4	GEN3_C236_I004	G12	260.997	6.03543	NA	16.4637	0.180621	24.1285
ML07_196	GEN3_C237	1	GEN3_C237_I001	G12	196.272	6.90407	10.7541	21.3584	0.319517	NA
ML07_197	GEN3_C237	2	GEN3_C237_I002	G12	231.179	6.74932	9.23396	20.9234	0.180621	NA
ML07_198	GEN3_C237	3	GEN3_C237_I003	G12	241.361	6.87604	8.38944	21.8607	0.180621	NA
ML07_199	GEN3_C237	4	GEN3_C237_I004	G12	230.452	6.71299	10.6978	21.705	0.180621	NA
ML07_200	GEN3_C237	5	GEN3_C237_I005	G12	226.816	6.8332	9.17766	22.0516	0.180621	NA
ML03_219	GEN3_C238	1	GEN3_C238_I001	G12	181.727	6.49866	NA	20.8845	0.180621	NA
ML03_220	GEN3_C238	2	GEN3_C238_I002	G12	212.998	6.72262	7.71383	21.9809	0.180621	NA
ML03_221	GEN3_C238	3	GEN3_C238_I003	G12	205.726	6.81341	9.85327	22.5079	0.180621	NA
ML03_222	GEN3_C238	4	GEN3_C238_I004	G12	206.453	6.68039	8.33314	21.7404	0.180621	NA
ML03_223	GEN3_C238	5	GEN3_C238_I005	G12	215.18	6.70273	NA	21.4186	0.180621	NA
ML07_231	GEN3_C239	1	GEN3_C239_I001	G12	300.995	6.3684	7.99533	19.0172	0.180621	28.7208
ML07_232	GEN3_C239	2	GEN3_C239_I002	G12	285.723	6.89698	10.3037	20.255	0.319517	28.0647
ML07_233	GEN3_C239	3	GEN3_C239_I003	G12	236.27	6.96877	9.40286	22.5291	0.180621	NA
ML07_235	GEN3_C239	4	GEN3_C239_I004	G12	218.089	7.05346	9.17766	22.0941	0.319517	NA
ML03_209	GEN3_C240	1	GEN3_C240_I001	G12	183.909	6.9062	NA	24.2974	0.180621	NA
ML03_210	GEN3_C240	2	GEN3_C240_I002	G12	155.546	6.99593	7.03822	23.7917	0.319517	NA
ML03_211	GEN3_C240	3	GEN3_C240_I003	G12	223.18	7.43833	7.82643	22.1011	0.319517	NA
ML03_212	GEN3_C240	4	GEN3_C240_I004	G12	200.635	7.18233	6.70041	20.4884	0.319517	NA
ML03_213	GEN3_C240	5	GEN3_C240_I005	G12	226.816	7.04712	8.95245	24.1064	0.180621	NA
ML02_232	GEN3_C241	1	GEN3_C241_I001	G12	192.636	6.53309	6.70041	22.1896	0.180621	NA
ML02_233	GEN3_C241	2	GEN3_C241_I002	G12	186.09	6.47514	NA	22.9146	0.180621	NA
ML02_234	GEN3_C241	3	GEN3_C241_I003	G12	233.361	6.72582	NA	21.6202	0.180621	NA
ML02_235	GEN3_C241	4	GEN3_C241_I004	G12	184.636	6.74335	NA	22.7979	0.319517	NA
ML02_236	GEN3_C241	5	GEN3_C241_I005	G12	242.815	6.82449	7.99533	22.8969	0.180621	NA
ML07_201	GEN3_C242	1	GEN3_C242_I001	G12	243.543	7.4613	7.88273	21.118	0.319517	NA
ML07_211	GEN3_C243	1	GEN3_C243_I001	G12	285.558	6.78941	NA	24.9305	0.172249	24.8042
ML07_212	GEN3_C243	2	GEN3_C243_I002	G12	183.016	6.49895	6.53489	23.4946	0.172249	NA
ML07_213	GEN3_C243	3	GEN3_C243_I003	G12	303.012	6.74403	10.3634	21.4681	0.172249	NA
ML07_214	GEN3_C243	4	GEN3_C243_I004	G12	267.377	6.98926	11.039	21.7828	0.311145	23.4921
ML07_215	GEN3_C243	5	GEN3_C243_I005	G12	186.652	6.55537	7.77352	21.1851	0.172249	NA
ML07_207	GEN3_C244	1	GEN3_C244_I001	G12	249.195	6.93993	8.11133	23.2011	0.172249	NA
ML07_208	GEN3_C244	2	GEN3_C244_I002	G12	233.923	6.95487	NA	23.0454	0.172249	NA
ML07_209	GEN3_C244	3	GEN3_C244_I003	G12	212.106	7.15539	8.50543	24.2055	0.311145	NA
ML06_234	GEN3_C245	1	GEN3_C245_I001	G12	223.015	6.67982	NA	21.4928	0.172249	NA
ML06_235	GEN3_C245	2	GEN3_C245_I002	G12	248.468	7.15454	8.28023	22.6635	0.311145	NA
ML06_236	GEN3_C245	3	GEN3_C245_I003	G12	227.378	7.47444	10.0256	22.1118	0.172249	NA
ML06_237	GEN3_C245	4	GEN3_C245_I004	G12	222.287	6.77929	9.23735	21.6555	0.172249	NA
ML06_238	GEN3_C245	5	GEN3_C245_I005	G12	239.741	7.53622	7.99872	22.1471	0.311145	NA
ML03_194	GEN3_C246	1	GEN3_C246_I001	G12	226.651	6.23543	14.0229	18.179	0.311145	17.5877
ML03_195	GEN3_C246	2	GEN3_C246_I002	G12	241.196	7.27099	10.7575	19.3213	0.172249	25.4602
ML03_196	GEN3_C246	3	GEN3_C246_I003	G12	266.649	7.53157	9.29365	20.3823	0.311145	18.8998
ML03_197	GEN3_C246	4	GEN3_C246_I004	G12	274.649	6.77249	12.1087	20.4248	0.172249	NA
ML03_198	GEN3_C246	5	GEN3_C246_I005	G12	247.014	7.5471	8.28023	20.6653	0.311145	NA
ML02_237	GEN3_C247	1	GEN3_C247_I001	G12	223.015	6.86159	9.29365	21.7263	0.311145	NA
ML02_238	GEN3_C247	2	GEN3_C247_I002	G12	194.652	6.77935	NA	19.0773	0.311145	NA
ML02_239	GEN3_C247	3	GEN3_C247_I003	G12	192.47	6.65815	8.44913	22.8863	0.172249	NA
ML02_240	GEN3_C247	4	GEN3_C247_I004	G12	188.834	7.11408	9.12474	21.1745	0.392394	NA
ML03_193	GEN3_C247	5	GEN3_C247_I005	G12	188.107	7.01628	9.29365	21.8288	0.311145	NA
ML08_203	GEN3_C248	1	GEN3_C248_I001	G12	243.378	6.66316	7.26681	21.7121	0.172249	NA
ML08_204	GEN3_C248	2	GEN3_C248_I002	G12	267.377	6.83025	8.50543	21.3655	0.172249	NA
ML08_205	GEN3_C248	3	GEN3_C248_I003	G12	217.197	6.77935	NA	24.0534	0.172249	NA
ML08_206	GEN3_C248	4	GEN3_C248_I004	G12	192.47	6.4154	10.3634	20.3576	0.172249	NA
ML06_239	GEN3_C249	1	GEN3_C249_I001	G12	227.378	6.68856	6.19709	21.2453	0.172249	NA
ML07_193	GEN3_C249	2	GEN3_C249_I002	G12	240.469	6.87425	9.80036	23.0101	0.172249	NA
ML07_194	GEN3_C249	3	GEN3_C249_I003	G12	248.468	7.02136	NA	24.6051	0.172249	NA
ML07_195	GEN3_C249	4	GEN3_C249_I004	G12	237.56	7.15446	10.0256	24.4813	0.311145	NA
ML03_229	GEN3_C250	1	GEN3_C250_I001	G12	249.195	7.23941	9.68776	21.1604	0.311145	NA
ML03_230	GEN3_C250	2	GEN3_C250_I002	G12	291.376	7.20813	13.6851	22.4619	0.392394	16.9317
ML03_231	GEN3_C250	3	GEN3_C250_I003	G12	242.65	7.35721	8.22393	24.8421	0.311145	NA
ML03_232	GEN3_C250	4	GEN3_C250_I004	G12	319.011	6.9099	7.09791	25.6378	0.172249	32.0206
ML03_233	GEN3_C250	5	GEN3_C250_I005	G12	238.287	7.02196	7.66092	23.4663	0.172249	NA
ML03_199	GEN3_C251	1	GEN3_C251_I001	G13	240.634	6.55848	12.8372	20.2798	0.180621	22.1603
ML03_200	GEN3_C251	2	GEN3_C251_I002	G13	216.635	6.21995	13.1187	18.5079	0.180621	23.4724
ML03_201	GEN3_C251	3	GEN3_C251_I003	G13	242.815	6.00215	NA	17.2453	0.180621	26.7526
ML03_202	GEN3_C251	4	GEN3_C251_I004	G13	271.905	6.05823	10.1348	18.2002	0.180621	22.8164
ML03_203	GEN3_C251	5	GEN3_C251_I005	G13	259.542	6.17518	NA	19.0879	0.180621	24.1285
ML08_209	GEN3_C252	1	GEN3_C252_I001	G13	269.723	6.24164	5.06768	17.5247	0.319517	25.4406
ML08_210	GEN3_C252	2	GEN3_C252_I002	G13	224.634	7.12582	NA	22.7236	0.319517	NA
ML08_211	GEN3_C252	3	GEN3_C252_I003	G13	233.361	5.80379	NA	15.4416	0.180621	31.3449
ML08_212	GEN3_C252	4	GEN3_C252_I004	G13	225.362	7.36315	7.93903	22.522	0.458414	NA
ML07_236	GEN3_C253	1	GEN3_C253_I001	G13	250.088	6.153	9.90957	19.6184	0.180621	27.4087
ML07_239	GEN3_C253	2	GEN3_C253_I002	G13	257.36	6.15168	7.71383	18.6104	0.319517	20.8483
ML08_066	GEN3_C254	1	GEN3_C254_I001	G13	263.906	6.81722	12.3305	22.6564	0.319517	28.7208
ML08_067	GEN3_C254	2	GEN3_C254_I002	G13	208.635	5.93947	NA	16.9517	0.180621	20.8483
ML08_069	GEN3_C254	3	GEN3_C254_I003	G13	226.089	6.37432	13.7943	18.1224	0.180621	32.001
ML08_070	GEN3_C254	4	GEN3_C254_I004	G13	223.907	6.019	10.4726	18.5432	0.180621	27.4087
ML08_081	GEN3_C255	1	GEN3_C255_I001	G13	268.104	6.47623	8.89954	19.6396	0.172249	22.836
ML08_082	GEN3_C255	2	GEN3_C255_I002	G13	246.287	6.40287	NA	17.8005	0.392394	16.9317
ML08_083	GEN3_C255	3	GEN3_C255_I003	G13	237.56	5.85906	7.88612	16.2762	0.172249	30.7085
ML08_084	GEN3_C255	4	GEN3_C255_I004	G13	274.649	6.23833	9.85666	15.8271	0.311145	26.1162
ML08_085	GEN3_C255	5	GEN3_C255_I005	G13	225.924	6.6065	11.4894	17.8147	0.311145	24.8042
ML07_227	GEN3_C256	1	GEN3_C256_I001	G13	235.378	6.07263	NA	19.1197	0.172249	23.4921
ML07_228	GEN3_C256	2	GEN3_C256_I002	G13	216.469	6.03897	11.4894	16.446	0.172249	21.524
ML07_229	GEN3_C256	3	GEN3_C256_I003	G13	279.013	6.61458	6.929	18.957	0.392394	26.1162
ML07_230	GEN3_C256	4	GEN3_C256_I004	G13	257.922	5.30018	NA	15.7811	0.172249	28.0844
ML04_196	GEN3_C257	1	GEN3_C257_I001	G13	239.741	7.1862	11.1516	21.3478	0.311145	NA
ML03_239	GEN3_C258	1	GEN3_C258_I001	G13	265.195	6.11776	NA	18.9676	0.172249	29.3965
ML03_240	GEN3_C258	2	GEN3_C258_I002	G13	236.105	6.5487	10.2508	18.1082	0.392394	22.836
ML04_194	GEN3_C258	3	GEN3_C258_I003	G13	231.014	5.38461	NA	14.8757	0.172249	26.1162
ML04_195	GEN3_C258	4	GEN3_C258_I004	G13	239.741	5.72708	NA	17.7298	0.172249	22.836
ML07_216	GEN3_C259	1	GEN3_C259_I001	G13	225.924	6.13938	NA	17.5671	0.311145	23.4921
ML07_217	GEN3_C259	2	GEN3_C259_I002	G13	197.561	5.36858	NA	14.1754	0.172249	26.1162
ML07_218	GEN3_C259	3	GEN3_C259_I003	G13	268.831	6.03524	6.47859	16.4743	0.172249	20.2119
ML07_219	GEN3_C259	4	GEN3_C259_I004	G13	279.013	5.98195	NA	18.5468	0.172249	22.18
ML07_220	GEN3_C259	5	GEN3_C259_I005	G13	244.105	6.15272	16.0498	18.0941	0.172249	22.836
